# Supplementary material for: Fractionation of human spermatogenic cells using STA-PUT gravity sedimentation and their miRNA profiling
Source: PubMed Central journal article supplement (PMC5155379; doi:10.1038/srep08084), 2015-01-30
Supplement: srep08084-s1.pdf [file srep08084-s1.pdf]

1 **Fractionation of human spermatogenic cells using STA-PUT gravity**  
2 **sedimentation and their miRNA profiling**

3 Yun Liu, Minghui Niu, Chencheng Yao, Yanan Hai, Qingqing Yuan, Yang Liu, Ying  
4 Guo, Zheng Li & Zuping He

5

6

7

8

9

10

11

12

13

14

15

16

17

18

19

20

21

22

23 **Supplementary Information**

24

25 **Supplementary Figure 1**

26

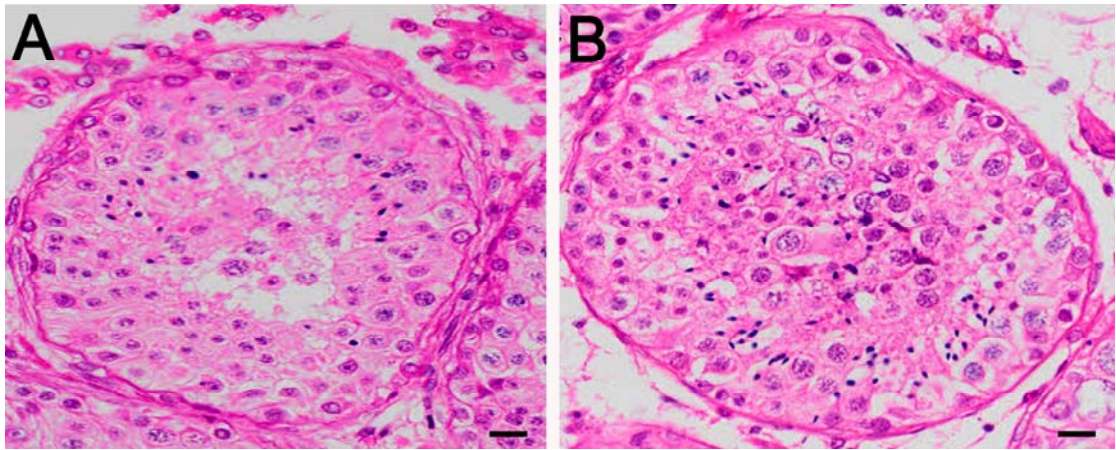

41 **Supplementary Figure 2**

42

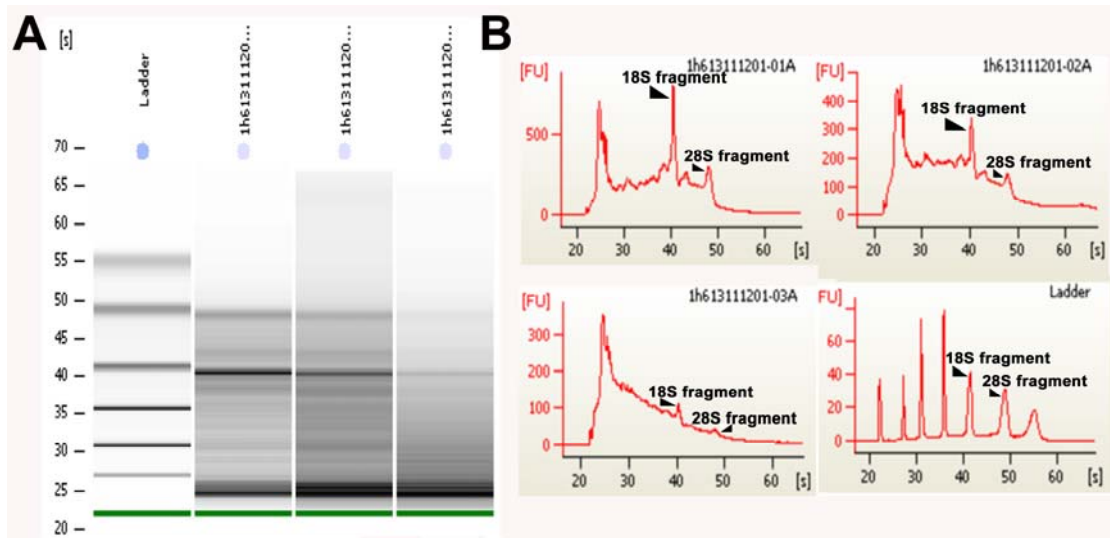

43

44

45

46

47

48

49

50

51

52

53

54

55

56

57

58 **Legends for Supplementary Figures**

59

60 **Supplementary Figure 1.** H&E staining showed the morphology of representative  
61 testis tissues of OA patients (A, B). Scale bars in A, B = 20  $\mu$ m.

62

63 **Supplementary Figure 2.** (A-B), Gel imaging (A) and electropherogram (B) assays  
64 reflected the quality of total RNA isolated from human spermatogonia, pachytene  
65 spermatocytes and round spermatids.

66

67

68

69

70

71

72

73

74

75

76

77

78

79

80 **Supplementary Tables**81 **Supplementary Table 1.** Up-regulated miRNAs between human spermatogonia and  
82 pachytene spermatocytes

| ID            | Name             | Normalized Intensity |             | $\log_2$ (Ratio) |              | P-value<br>(Differentially<br>expressed) |
|---------------|------------------|----------------------|-------------|------------------|--------------|------------------------------------------|
|               |                  | S2                   | S1          | S2/S1            | S1/S2        | S1/S2                                    |
| PH_mr_0004621 | hsa-miR-4725-3p  | 6929.750254          | 3545.08495  | 1.954748716      | -0.96698316  | 6.65868E-06                              |
| PH_mr_0003464 | hsa-miR-1908     | 13560.3136           | 6974.03186  | 1.944400868      | -0.959325683 | 2.67413E-05                              |
| PH_mr_0001438 | hsa-miR-1225-5p  | 1590.414628          | 853.2121418 | 1.864031874      | -0.89842653  | 1.37044E-06                              |
| PH_mr_0004266 | hsa-miR-3164     | 554.7676309          | 309.3181484 | 1.793517884      | -0.842792131 | 1.8473E-05                               |
| PH_mr_0004255 | hsa-miR-3153     | 1297.284133          | 727.8750482 | 1.782289606      | -0.833731781 | 2.38004E-05                              |
| PH_mr_0003467 | hsa-miR-1469     | 352.4833638          | 200.0793971 | 1.761717442      | -0.816982552 | 6.53647E-06                              |
| PH_mr_0001970 | hsa-miR-30b-3p   | 1895.657953          | 1083.18846  | 1.750072146      | -0.807414397 | 1.11696E-05                              |
| PH_mr_0004699 | hsa-miR-642b-3p  | 3931.824738          | 2248.018514 | 1.749017952      | -0.806545098 | 7.66176E-06                              |
| PH_mr_0004558 | hsa-miR-4665-5p  | 1104.69013           | 648.5332183 | 1.703367073      | -0.768389367 | 2.32871E-06                              |
| PH_mr_0001371 | hsa-miR-1224-5p  | 4343.660971          | 2558.486544 | 1.697746264      | -0.763620857 | 2.68238E-05                              |
| PH_mr_0002326 | hsa-miR-575      | 1086.520884          | 649.6830999 | 1.672385944      | -0.741907823 | 2.82981E-06                              |
| PH_mr_0004211 | hsa-miR-2276     | 926.6315233          | 570.34127   | 1.624696602      | -0.700170332 | 0.000644869                              |
| PH_mr_0004641 | hsa-miR-3158-5p  | 1449.905795          | 896.9076423 | 1.616560866      | -0.692927828 | 0.003256617                              |
| PH_mr_0004259 | hsa-miR-3156-5p  | 880.6027679          | 548.4935197 | 1.605493477      | -0.683016803 | 0.000262613                              |
| PH_mr_0000705 | hsa-miR-30c-2-3p | 782.4888419          | 490.9994401 | 1.593665446      | -0.6723488   | 1.0567E-06                               |
| PH_mr_0002420 | hsa-miR-30c-1-3p | 3567.228544          | 2241.119224 | 1.591717435      | -0.670584249 | 3.6139E-05                               |
| PH_mr_0001619 | hsa-miR-663a     | 975.0828448          | 612.8868889 | 1.590967049      | -0.669903956 | 1.77408E-05                              |
| PH_mr_0004669 | hsa-miR-3679-5p  | 13699.61115          | 8710.353065 | 1.572796309      | -0.653331841 | 0.000216247                              |
| PH_mr_0004045 | hsa-miR-3184-5p  | 641.9800096          | 408.2079654 | 1.572678791      | -0.65322404  | 0.000111537                              |
| PH_mr_0004748 | hsa-miR-4484     | 6448.870889          | 4118.875865 | 1.56568712       | -0.646795939 | 0.000179915                              |
| PH_mr_0000512 | hsa-miR-320c     | 1876.277424          | 1206.225791 | 1.555494368      | -0.637373171 | 8.5358E-06                               |
| PH_mr_0002564 | hsa-miR-583      | 463.9214032          | 300.1190957 | 1.54579102       | -0.628345291 | 0.000237474                              |
| PH_mr_0005048 | hsa-miR-4531     | 530.5419702          | 343.8145962 | 1.543104848      | -0.625836091 | 0.000102604                              |
| PH_mr_0008683 | hsa-miR-6126     | 21918.16655          | 14219.43578 | 1.541423085      | -0.624262902 | 3.33479E-05                              |
| PH_mr_0004213 | hsa-miR-711      | 1832.671235          | 1195.876856 | 1.532491598      | -0.615879164 | 2.27569E-05                              |
| PH_mr_0003304 | hsa-miR-675-5p   | 862.4335223          | 563.4419804 | 1.530651872      | -0.614146197 | 0.035055778                              |
| PH_mr_0004818 | hsa-miR-4698     | 1336.04519           | 873.9100104 | 1.528813235      | -0.612412173 | 0.000282942                              |
| PH_mr_0004850 | hsa-miR-371b-5p  | 499.0486112          | 327.7162539 | 1.522807018      | -0.606733123 | 0.001004062                              |
| PH_mr_0004837 | hsa-miR-4732-5p  | 4319.43531           | 2844.80706  | 1.518357913      | -0.602511908 | 1.50658E-05                              |
| PH_mr_0000514 | hsa-miR-184      | 369.4413263          | 243.7748977 | 1.515501923      | -0.599795683 | 0.000102329                              |
| PH_mr_0001866 | hsa-miR-150-3p   | 794.6016723          | 524.3460063 | 1.51541475       | -0.599712696 | 1.32038E-05                              |
| PH_mr_0004243 | hsa-miR-3138     | 2415.298376          | 1605.234703 | 1.504638774      | -0.589417173 | 0.000384259                              |

83

84 **Supplementary Table 2.** Down-regulated miRNAs between human spermatogonia  
 85 and pachytene spermatocytes

| ID            | Name             | Normalized Intensity |             | log <sub>2</sub> (Ratio) |             | P-value<br>(Differentially<br>expressed) |
|---------------|------------------|----------------------|-------------|--------------------------|-------------|------------------------------------------|
|               |                  | S2                   | S1          | S2/S1                    | S1/S2       | S1/S2                                    |
| PH_mr_0004578 | hsa-miR-4730     | 266.4822681          | 400.1587943 | 0.665941301              | 0.586533077 | 0.001603233                              |
| PH_mr_0000485 | hsa-miR-449a     | 654.09284            | 985.4485249 | 0.663751402              | 0.591285092 | 0.010168286                              |
| PH_mr_0004592 | hsa-miR-4763-5p  | 28385.20669          | 42848.03779 | 0.662462231              | 0.594089891 | 0.000298617                              |
| PH_mr_0001101 | hsa-miR-99b-5p   | 232.5663431          | 353.013649  | 0.658802694              | 0.602081639 | 3.9567E-05                               |
| PH_mr_0002598 | hsa-miR-634      | 9227.554176          | 14051.55306 | 0.656692832              | 0.606709387 | 0.002063493                              |
| PH_mr_0004654 | hsa-miR-3651     | 365.8074772          | 558.8424541 | 0.654580686              | 0.611357059 | 0.000121451                              |
| PH_mr_0008662 | hsa-miR-6511a-3p | 9508.57184           | 14541.40262 | 0.65389647               | 0.61286586  | 0.00048655                               |
| PH_mr_0000446 | hsa-miR-22-3p    | 316.1448726          | 484.1001505 | 0.653056753              | 0.614719721 | 0.013434835                              |
| PH_mr_0001697 | hsa-miR-20b-5p   | 347.6382316          | 534.6949406 | 0.650161812              | 0.621129274 | 0.000762987                              |
| PH_mr_0004792 | hsa-miR-4641     | 1551.65357           | 2388.304068 | 0.649688451              | 0.622180035 | 0.00240665                               |
| PH_mr_0004196 | hsa-miR-670      | 283.4402307          | 438.1048868 | 0.646968886              | 0.628231763 | 0.000449939                              |
| PH_mr_0001699 | hsa-miR-17-5p    | 398.5121192          | 617.4864153 | 0.645377954              | 0.631783799 | 0.002040824                              |
| PH_mr_0000770 | hsa-miR-30b-5p   | 302.8207592          | 473.7512162 | 0.639197851              | 0.645665537 | 3.75031E-05                              |
| PH_mr_0000352 | hsa-miR-34a-5p   | 484.5132148          | 760.0717328 | 0.637457221              | 0.649599566 | 0.001450411                              |
| PH_mr_0000996 | hsa-miR-130a-3p  | 242.2566074          | 385.2103336 | 0.628894363              | 0.66911039  | 0.000245998                              |
| PH_mr_0008719 | hsa-miR-98-3p    | 524.485555           | 837.1137995 | 0.626540329              | 0.67452072  | 0.000225978                              |
| PH_mr_0008606 | hsa-miR-1229-5p  | 758.2631811          | 1214.274962 | 0.624457561              | 0.679324567 | 0.000130836                              |
| PH_mr_0003276 | hsa-miR-664a-3p  | 1603.738741          | 2586.083702 | 0.620141854              | 0.689329834 | 0.00866003                               |
| PH_mr_0002482 | hsa-miR-1281     | 5075.275925          | 8240.051493 | 0.615927695              | 0.699167094 | 0.000194081                              |
| PH_mr_0002947 | hsa-miR-19b-3p   | 485.7244978          | 789.9686542 | 0.614865533              | 0.701657157 | 0.002549037                              |
| PH_mr_0008024 | hsa-miR-3184-3p  | 10087.56513          | 16431.80796 | 0.613904761              | 0.703913237 | 0.005285395                              |
| PH_mr_0001893 | hsa-miR-30d-5p   | 295.553061           | 485.2500321 | 0.609073759              | 0.715311146 | 0.001268905                              |
| PH_mr_0004643 | hsa-miR-3173-5p  | 2185.154599          | 3589.930332 | 0.608689973              | 0.716220493 | 4.03438E-05                              |
| PH_mr_0003167 | hsa-miR-107      | 300.3981932          | 501.3483744 | 0.599180547              | 0.738937309 | 0.001457314                              |
| PH_mr_0001807 | hsa-miR-1224-3p  | 5777.820086          | 9649.806326 | 0.59874985               | 0.739974706 | 2.95691E-05                              |
| PH_mr_0008170 | hsa-miR-3676-5p  | 943.5894858          | 1585.686716 | 0.595066778              | 0.748876518 | 2.03886E-05                              |
| PH_mr_0004647 | hsa-miR-3609     | 262.848419           | 443.8542948 | 0.592195281              | 0.7558551   | 0.000811521                              |
| PH_mr_0000379 | hsa-miR-574-5p   | 7016.962633          | 12009.36335 | 0.584290976              | 0.775241087 | 0.000382172                              |
| PH_mr_0004339 | hsa-miR-4290     | 3477.593599          | 6012.730848 | 0.578371739              | 0.789931034 | 0.000611943                              |
| PH_mr_0002874 | hsa-miR-21-5p    | 248.3130226          | 430.0557157 | 0.577397331              | 0.792363655 | 0.001809887                              |
| PH_mr_0001700 | hsa-miR-106a-5p  | 390.0331379          | 678.4301397 | 0.574905381              | 0.798603561 | 6.11086E-05                              |
| PH_mr_0002893 | hsa-miR-125a-5p  | 686.797482           | 1195.876856 | 0.574304518              | 0.800112183 | 0.000481501                              |
| PH_mr_0001853 | hsa-miR-877-3p   | 4938.400942          | 8605.71384  | 0.573851401              | 0.801250896 | 0.000291823                              |
| PH_mr_0003354 | hsa-miR-1258     | 179.2698895          | 315.0675564 | 0.568988732              | 0.813528012 | 2.02071E-05                              |
| PH_mr_0004911 | hsa-miR-4646-3p  | 4650.115579          | 8174.508242 | 0.568855696              | 0.813865369 | 4.6105E-05                               |

|               |                    |             |             |             |             |             |
|---------------|--------------------|-------------|-------------|-------------|-------------|-------------|
| PH_mr_0004336 | hsa-miR-4286       | 8126.497895 | 14311.4263  | 0.567832844 | 0.816461797 | 0.000405512 |
| PH_mr_0001891 | hsa-miR-30a-5p     | 259.2145699 | 464.5521634 | 0.55798808  | 0.841693791 | 0.000422797 |
| PH_mr_0005021 | hsa-miR-4455       | 1757.571687 | 3163.324262 | 0.555609081 | 0.847857915 | 4.31472E-05 |
| PH_mr_0004646 | hsa-miR-3607-5p    | 245.8904565 | 448.4538212 | 0.548307194 | 0.866943691 | 0.000376802 |
| PH_mr_0000142 | hsa-miR-98-5p      | 329.4689861 | 608.2873625 | 0.541633784 | 0.884610366 | 5.87546E-05 |
| PH_mr_0000333 | hsa-miR-497-5p     | 274.9612494 | 516.2968351 | 0.532564274 | 0.908972442 | 0.00022628  |
| PH_mr_0004085 | hsa-miR-3149       | 2351.100375 | 4473.039396 | 0.525615843 | 0.927919332 | 0.000188402 |
| PH_mr_0001948 | hsa-miR-199a-5p    | 336.7366843 | 641.6339287 | 0.524811219 | 0.930129534 | 0.000430942 |
| PH_mr_0000149 | hsa-miR-29b-3p     | 266.4822681 | 510.5474272 | 0.521953993 | 0.938005448 | 0.000456434 |
| PH_mr_0008666 | hsa-miR-6716-3p    | 937.5330706 | 1806.463982 | 0.518987968 | 0.946227004 | 0.000904642 |
| PH_mr_0001124 | hsa-miR-10b-5p     | 244.6791735 | 472.6013346 | 0.517728486 | 0.949732396 | 0.003110353 |
| PH_mr_0003339 | hsa-miR-424-5p     | 666.2056703 | 1294.766673 | 0.51453724  | 0.958652598 | 0.000526557 |
| PH_mr_0000525 | hsa-miR-26b-5p     | 297.9756271 | 594.4887834 | 0.501230024 | 0.99645526  | 0.00047356  |
| PH_mr_0001874 | hsa-miR-24-3p      | 459.076271  | 931.4040901 | 0.492886252 | 1.020673354 | 5.52966E-05 |
| PH_mr_0008021 | hsa-miR-5100       | 4349.717386 | 8998.973344 | 0.48335707  | 1.048838752 | 1.9564E-05  |
| PH_mr_0004335 | hsa-miR-4284       | 11422.39904 | 23703.65915 | 0.481883365 | 1.053244095 | 0.000108352 |
| PH_mr_0000205 | hsa-let-7e-5p      | 552.3450649 | 1153.331237 | 0.478912776 | 1.062165171 | 0.000174487 |
|               | hsa-miR-199a-3p,hs |             |             |             |             |             |
| PH_mr_0002734 | a-miR-199b-3p      | 359.751062  | 752.0225616 | 0.478378017 | 1.063776999 | 0.001463318 |
| PH_mr_0003406 | hsa-miR-1248       | 311.2997405 | 651.9828631 | 0.477466139 | 1.06652967  | 4.57372E-05 |
| PH_mr_0000117 | hsa-miR-32-3p      | 1177.367112 | 2471.095543 | 0.47645552  | 1.069586559 | 0.000121031 |
| PH_mr_0004733 | hsa-miR-4454       | 13113.35016 | 27707.54686 | 0.473277199 | 1.079242677 | 6.07098E-05 |
| PH_mr_0002298 | hsa-miR-27a-3p     | 605.6415185 | 1280.968094 | 0.472799847 | 1.080698527 | 0.000256961 |
| PH_mr_0000222 | hsa-let-7g-5p      | 485.7244978 | 1038.343078 | 0.467788064 | 1.096073046 | 0.004325774 |
| PH_mr_0002737 | hsa-miR-29a-3p     | 421.5264969 | 917.605511  | 0.459376597 | 1.122250735 | 3.81485E-06 |
| PH_mr_0002203 | hsa-miR-27b-3p     | 399.7234022 | 883.1090632 | 0.452631978 | 1.143589581 | 0.013514202 |
| PH_mr_0002736 | hsa-miR-29c-3p     | 291.9192119 | 668.0812054 | 0.43695169  | 1.194454312 | 1.51278E-05 |
| PH_mr_0001589 | hsa-miR-16-5p      | 1317.875944 | 3067.884089 | 0.429571622 | 1.219029405 | 2.85784E-05 |
| PH_mr_0000017 | hsa-miR-100-5p     | 232.5663431 | 541.5942302 | 0.429410673 | 1.219570044 | 3.43254E-06 |
| PH_mr_0000207 | hsa-let-7d-5p      | 794.6016723 | 1866.257825 | 0.425772721 | 1.231844575 | 0.00081694  |
| PH_mr_0000163 | hsa-let-7b-5p      | 1044.125978 | 2460.746608 | 0.424312676 | 1.236800317 | 0.000755318 |
| PH_mr_0000023 | hsa-miR-126-3p     | 352.4833638 | 838.2636811 | 0.420492229 | 1.249848956 | 0.000728917 |
| PH_mr_0000042 | hsa-miR-125b-5p    | 781.2775588 | 1914.552852 | 0.408073122 | 1.293100406 | 0.013305105 |
| PH_mr_0001774 | hsa-miR-125b-1-3p  | 330.6802691 | 811.8164044 | 0.40733381  | 1.295716527 | 3.30326E-06 |
| PH_mr_0000129 | hsa-miR-363-5p     | 4164.391081 | 10540.96456 | 0.395067364 | 1.339829423 | 2.1798E-06  |
| PH_mr_0002528 | hsa-miR-23b-3p     | 411.8362326 | 1044.092486 | 0.394444207 | 1.342106846 | 0.000371313 |
| PH_mr_0000750 | hsa-miR-26a-5p     | 664.9943873 | 1701.824757 | 0.390753739 | 1.355668416 | 0.000896776 |
| PH_mr_0000169 | hsa-let-7c         | 1057.450091 | 2724.069493 | 0.388187634 | 1.365173934 | 9.24107E-05 |
| PH_mr_0001128 | hsa-miR-99a-5p     | 239.8340413 | 673.8306133 | 0.355926306 | 1.490349529 | 0.000971229 |
| PH_mr_0002380 | hsa-miR-23a-3p     | 385.1880058 | 1162.53029  | 0.331335888 | 1.593633621 | 0.00046493  |

|               |                |             |             |             |             |             |
|---------------|----------------|-------------|-------------|-------------|-------------|-------------|
| PH_mr_0002054 | hsa-miR-143-3p | 771.5872945 | 2460.746608 | 0.313558207 | 1.673194814 | 6.55836E-05 |
| PH_mr_0000823 | hsa-miR-145-5p | 892.7155982 | 2903.451022 | 0.307467077 | 1.701496158 | 2.68582E-06 |
| PH_mr_0000206 | hsa-let-7f-5p  | 1027.168015 | 3424.347383 | 0.299960226 | 1.737156879 | 8.36704E-06 |
| PH_mr_0000203 | hsa-let-7a-5p  | 1110.746545 | 4185.568997 | 0.26537528  | 1.913894106 | 1.79242E-05 |

86

87

88

89

90

91

92

93

94

95

96

97

98

99

100

101

102

103

104

105

106

107

108

109

110

111

112

113

114

115

116

117

118

119

120

121

122

123

124



125 **Supplementary Table 3.** Up-regulated miRNAs between human pachytene  
 126 spermatocytes and round spermatids

| ID            | Name                             | Normalized Intensity |             | S1/S3       | log <sub>2</sub> (Ratio) |             | P-value<br>(Differentially<br>expressed) |
|---------------|----------------------------------|----------------------|-------------|-------------|--------------------------|-------------|------------------------------------------|
|               |                                  | S3                   | S1          |             | S1/S3                    | S1/S3       | S1/S3                                    |
| PH_mr_0000645 | hsa-miR-520a-5p                  | 79.69374239          | 119.5876856 | 1.500590662 | 0.585530486              | 0.000221888 |                                          |
| PH_mr_0001842 | hsa-miR-139-5p                   | 91.89909032          | 137.9857911 | 1.501492459 | 0.586397229              | 5.34137E-05 |                                          |
| PH_mr_0000469 | hsa-miR-335-5p                   | 118.4636711          | 178.2316469 | 1.504525777 | 0.589308825              | 7.61292E-05 |                                          |
| PH_mr_0000484 | hsa-miR-143-5p                   | 119.8995944          | 180.5314101 | 1.505688246 | 0.59042309               | 7.12402E-05 |                                          |
| PH_mr_0004601 | hsa-miR-3162-3p                  | 3522.319821          | 5307.853432 | 1.506919786 | 0.591602624              | 0.000826788 |                                          |
| PH_mr_0001239 | hsa-miR-191-5p                   | 277.8511559          | 419.7067813 | 1.510545385 | 0.595069531              | 0.000447765 |                                          |
| PH_mr_0000329 | hsa-miR-377-3p                   | 95.48889854          | 144.8850807 | 1.517297643 | 0.601504122              | 4.73226E-05 |                                          |
| PH_mr_0002897 | hsa-miR-135a-5p                  | 82.56558896          | 125.3370936 | 1.518030637 | 0.602200908              | 0.000408071 |                                          |
| PH_mr_0000913 | hsa-miR-424-3p                   | 129.9510574          | 197.7796339 | 1.521954787 | 0.605925501              | 1.94666E-05 |                                          |
| PH_mr_0000433 | hsa-miR-296-5p                   | 90.46316704          | 137.9857911 | 1.525325673 | 0.609117306              | 9.47483E-06 |                                          |
| PH_mr_0002986 | hsa-miR-136-5p                   | 112.719978           | 172.4822389 | 1.530183398 | 0.613704575              | 0.000179543 |                                          |
| PH_mr_0000010 | hsa-miR-7-5p                     | 103.3864766          | 158.6836598 | 1.534858958 | 0.618106089              | 1.42127E-05 |                                          |
| PH_mr_0000812 | hsa-miR-92b-3p                   | 269.2356162          | 413.9573734 | 1.537528278 | 0.620612945              | 0.000157018 |                                          |
| PH_mr_0004548 | hsa-miR-4634                     | 463.8032215          | 714.0764691 | 1.539610844 | 0.622565737              | 1.10444E-05 |                                          |
| PH_mr_0001853 | hsa-miR-877-3p                   | 5589.331392          | 8605.71384  | 1.539667849 | 0.622619153              | 0.000244143 |                                          |
| PH_mr_0008636 | hsa-miR-6500-5p                  | 132.1049423          | 203.5290419 | 1.540661828 | 0.623550228              | 6.68848E-06 |                                          |
| PH_mr_0001946 | hsa-miR-199b-5p                  | 104.1044383          | 160.983423  | 1.546364648 | 0.628880561              | 1.47995E-05 |                                          |
| PH_mr_0004040 | hsa-miR-3178                     | 1536.437916          | 2376.805252 | 1.546958212 | 0.629434226              | 5.91649E-07 |                                          |
| PH_mr_0000647 | hsa-miR-145-3p                   | 87.59132046          | 135.6860279 | 1.549080745 | 0.631412346              | 5.58992E-05 |                                          |
| PH_mr_0008677 | hsa-miR-6073                     | 94.7709369           | 147.1848439 | 1.553058867 | 0.635112514              | 0.033031543 |                                          |
| PH_mr_0004830 | hsa-miR-4716-5p                  | 360.4167449          | 559.9923356 | 1.553735623 | 0.635741042              | 0.000363533 |                                          |
| PH_mr_0004749 | hsa-miR-4485                     | 679.1917144          | 1059.040947 | 1.559266588 | 0.640867607              | 1.02158E-05 |                                          |
| PH_mr_0004727 | hsa-miR-4445-5p                  | 170.8748711          | 266.7725295 | 1.561215689 | 0.642669866              | 1.42022E-05 |                                          |
| PH_mr_0000770 | hsa-miR-30b-5p                   | 301.5438901          | 473.7512162 | 1.571085443 | 0.651761643              | 4.57301E-05 |                                          |
| PH_mr_0000352 | hsa-miR-34a-5p                   | 480.3163393          | 760.0717328 | 1.582439885 | 0.662150695              | 0.000776969 |                                          |
| PH_mr_0000965 | hsa-miR-106b-5p                  | 206.0549916          | 326.5663723 | 1.584850577 | 0.664346827              | 0.000124391 |                                          |
| PH_mr_0000045 | hsa-miR-9-5p                     | 81.84762732          | 129.93662   | 1.587542904 | 0.666795582              | 0.00069201  |                                          |
| PH_mr_0002575 | hsa-miR-491-3p                   | 178.7724491          | 286.3205166 | 1.601591956 | 0.679506634              | 3.76333E-05 |                                          |
| PH_mr_0008650 | hsa-miR-6723-5p                  | 160.1054464          | 257.5734768 | 1.608773983 | 0.685961656              | 4.69548E-06 |                                          |
| PH_mr_0001599 | hsa-miR-126-5p                   | 82.56558896          | 133.3862648 | 1.615518843 | 0.691997578              | 0.000958578 |                                          |
| PH_mr_0004147 | hsa-miR-4328                     | 225.4399559          | 365.6623465 | 1.621994402 | 0.69776884               | 0.000138319 |                                          |
| PH_mr_0000014 | hsa-miR-31-5p                    | 154.3617533          | 250.6741872 | 1.623939751 | 0.699498109              | 0.004872711 |                                          |
| PH_mr_0002335 | hsa-miR-30c-5p                   | 234.0554957          | 380.6108072 | 1.62615625  | 0.701465886              | 0.000489744 |                                          |
| PH_mr_0000566 | hsa-miR-151a-5p,<br>hsa-miR-151b | 207.4909149          | 338.0651883 | 1.62930116  | 0.704253296              | 3.10061E-05 |                                          |

|               |                  |             |             |             |             |             |
|---------------|------------------|-------------|-------------|-------------|-------------|-------------|
| PH_mr_0004876 | hsa-miR-5096     | 3388.060994 | 5526.330935 | 1.631119081 | 0.705862111 | 0.000157449 |
| PH_mr_0001494 | hsa-miR-140-3p   | 153.6437916 | 250.6741872 | 1.631528255 | 0.706223972 | 0.001208445 |
| PH_mr_0001101 | hsa-miR-99b-5p   | 216.1064546 | 353.013649  | 1.633517377 | 0.707981802 | 7.50872E-06 |
| PH_mr_0000751 | hsa-miR-146b-5p  | 114.1559013 | 187.4306996 | 1.641883578 | 0.715351833 | 1.57845E-05 |
| PH_mr_0001183 | hsa-miR-518e-3p  | 77.53985746 | 127.6368568 | 1.646080622 | 0.719034998 | 0.000137515 |
| PH_mr_0004092 | hsa-miR-3182     | 236.2093806 | 393.2595047 | 1.664876745 | 0.735415375 | 5.06517E-05 |
| PH_mr_0002876 | hsa-miR-425-5p   | 140.7204821 | 234.5758449 | 1.666963057 | 0.737222132 | 0.000237383 |
| PH_mr_0004651 | hsa-miR-23c      | 87.59132046 | 146.0349623 | 1.667230971 | 0.737453983 | 0.0001912   |
| PH_mr_0004277 | hsa-miR-3176     | 360.4167449 | 602.5379546 | 1.671781245 | 0.741386081 | 8.06511E-07 |
|               | hsa-miR-517a-3p, |             |             |             |             |             |
| PH_mr_0000404 | hsa-miR-517b-3p  | 96.92482183 | 162.1333046 | 1.672773821 | 0.742242389 | 1.37469E-05 |
| PH_mr_0001124 | hsa-miR-10b-5p   | 280.7230025 | 472.6013346 | 1.683514819 | 0.75147642  | 0.003210357 |
| PH_mr_0000436 | hsa-miR-92a-3p   | 298.6720436 | 503.6481376 | 1.686291531 | 0.753853975 | 0.000442588 |
| PH_mr_0004563 | hsa-miR-4687-5p  | 6499.706755 | 10969.87039 | 1.68774851  | 0.755099946 | 7.96494E-06 |
| PH_mr_0000581 | hsa-miR-181a-5p  | 127.0792108 | 215.0278578 | 1.692077378 | 0.758795544 | 9.9919E-05  |
| PH_mr_0000398 | hsa-miR-517c-3p  | 93.33501361 | 158.6836598 | 1.700151461 | 0.765663278 | 0.000151057 |
| PH_mr_0000191 | hsa-miR-519b-3p  | 79.69374239 | 135.6860279 | 1.702593251 | 0.767733817 | 0.000133811 |
| PH_mr_0001737 | hsa-miR-28-5p    | 155.0797149 | 264.4727663 | 1.705398842 | 0.770109183 | 0.006429528 |
| PH_mr_0000747 | hsa-miR-186-5p   | 75.38597253 | 129.93662   | 1.72361801  | 0.785440079 | 0.000212434 |
| PH_mr_0001189 | hsa-miR-374a-5p  | 91.89909032 | 158.6836598 | 1.726716328 | 0.788031091 | 4.20414E-05 |
| PH_mr_0004057 | hsa-miR-4321     | 113.4379396 | 196.6297524 | 1.73336851  | 0.7935784   | 7.69414E-06 |
| PH_mr_0001355 | hsa-miR-127-3p   | 98.36074511 | 171.3323573 | 1.741877383 | 0.800643071 | 2.37202E-05 |
| PH_mr_0002107 | hsa-miR-153      | 79.69374239 | 139.1356727 | 1.74587952  | 0.803954005 | 2.21498E-05 |
| PH_mr_0004038 | hsa-miR-1193     | 269.2356162 | 473.7512162 | 1.759615696 | 0.815260376 | 2.3489E-05  |
|               | hsa-miR-520b,hsa |             |             |             |             |             |
| PH_mr_0000511 | -miR-520c-3p     | 96.20686018 | 171.3323573 | 1.780874638 | 0.832585964 | 2.75165E-05 |
| PH_mr_0004728 | hsa-miR-4446-5p  | 313.0312764 | 561.1422172 | 1.792607511 | 0.842059647 | 2.51962E-05 |
| PH_mr_0008666 | hsa-miR-6716-3p  | 1005.1463   | 1806.463982 | 1.797214974 | 0.845762987 | 0.002535634 |
| PH_mr_0004654 | hsa-miR-3651     | 310.8773915 | 558.8424541 | 1.797629771 | 0.846095923 | 1.36211E-05 |
| PH_mr_0000399 | hsa-miR-519a-3p  | 94.05297525 | 172.4822389 | 1.83388392  | 0.874902323 | 6.66992E-05 |
| PH_mr_0001673 | hsa-miR-18b-5p   | 82.56558896 | 151.7843702 | 1.838349028 | 0.878410702 | 1.68333E-06 |
| PH_mr_0001084 | hsa-miR-660-5p   | 116.3097862 | 216.1777394 | 1.858637579 | 0.894245483 | 2.06457E-05 |
| PH_mr_0000341 | hsa-miR-148a-3p  | 87.59132046 | 165.5829493 | 1.890403621 | 0.918694298 | 1.34186E-05 |
| PH_mr_0000663 | hsa-miR-1294     | 312.3133148 | 594.4887834 | 1.903501245 | 0.928655513 | 0.000784781 |
| PH_mr_0000557 | hsa-miR-376a-3p  | 101.9505533 | 194.3299892 | 1.906120004 | 0.930638951 | 7.9326E-05  |
| PH_mr_0001122 | hsa-miR-10a-5p   | 110.566093  | 212.7280946 | 1.923990337 | 0.944101554 | 0.006587085 |
| PH_mr_0000050 | hsa-miR-668      | 381.2376325 | 746.2731537 | 1.95750128  | 0.969013251 | 3.81075E-06 |
| PH_mr_0000222 | hsa-let-7g-5p    | 529.8556926 | 1038.343078 | 1.959671459 | 0.970611805 | 0.031580967 |
| PH_mr_0000177 | hsa-miR-520f     | 84.71947389 | 166.7328309 | 1.968057913 | 0.976772674 | 3.24924E-06 |
| PH_mr_0000023 | hsa-miR-126-3p   | 421.4434845 | 838.2636811 | 1.989029874 | 0.992064945 | 0.000832127 |

|               |                 |             |             |             |             |             |
|---------------|-----------------|-------------|-------------|-------------|-------------|-------------|
| PH_mr_0002947 | hsa-miR-19b-3p  | 397.0327887 | 789.9686542 | 1.989681147 | 0.992537252 | 0.00094915  |
| PH_mr_0001683 | hsa-miR-140-5p  | 73.2320876  | 146.0349623 | 1.994139005 | 0.995765979 | 1.48274E-05 |
| PH_mr_0002984 | hsa-miR-142-3p  | 68.2063561  | 137.9857911 | 2.023063524 | 1.016541621 | 0.000131319 |
| PH_mr_0000150 | hsa-let-7i-5p   | 198.8753752 | 408.2079654 | 2.052581749 | 1.037439682 | 0.000948346 |
| PH_mr_0001528 | hsa-miR-1246    | 12449.45489 | 25743.5491  | 2.067845486 | 1.048128388 | 0.000116651 |
| PH_mr_0002946 | hsa-miR-19a-3p  | 206.0549916 | 426.6060709 | 2.070350578 | 1.049875084 | 1.55166E-05 |
| PH_mr_0003348 | hsa-miR-101-3p  | 92.61705197 | 193.1801076 | 2.085794176 | 1.060596801 | 0.001564197 |
| PH_mr_0000849 | hsa-miR-144-3p  | 94.05297525 | 201.2292787 | 2.13953124  | 1.097294744 | 4.35566E-06 |
| PH_mr_0001697 | hsa-miR-20b-5p  | 247.6967669 | 534.6949406 | 2.15866742  | 1.110140988 | 0.000152156 |
| PH_mr_0003267 | hsa-miR-15b-5p  | 260.6200765 | 565.7417436 | 2.170752734 | 1.118195401 | 0.001245694 |
| PH_mr_0000996 | hsa-miR-130a-3p | 177.3365259 | 385.2103336 | 2.172199617 | 1.119156688 | 6.13124E-05 |
| PH_mr_0002893 | hsa-miR-125a-5p | 546.3688104 | 1195.876856 | 2.188772188 | 1.130121803 | 9.53199E-05 |
| PH_mr_0000142 | hsa-miR-98-5p   | 277.8511559 | 608.2873625 | 2.189256189 | 1.13044079  | 2.48599E-05 |
| PH_mr_0000555 | hsa-miR-376c-3p | 99.7966684  | 219.6273842 | 2.20074866  | 1.137994389 | 5.73515E-06 |
| PH_mr_0000333 | hsa-miR-497-5p  | 232.6195724 | 516.2968351 | 2.219490088 | 1.150228266 | 0.000186824 |
| PH_mr_0001699 | hsa-miR-17-5p   | 275.697271  | 617.4864153 | 2.239726252 | 1.163322411 | 0.000342179 |
| PH_mr_0001696 | hsa-miR-20a-5p  | 255.594345  | 576.0906779 | 2.253925759 | 1.172439996 | 7.89684E-06 |
| PH_mr_0003167 | hsa-miR-107     | 221.8501477 | 501.3483744 | 2.259851434 | 1.176227931 | 0.000395999 |
| PH_mr_0001893 | hsa-miR-30d-5p  | 214.6705313 | 485.2500321 | 2.260440821 | 1.176604148 | 9.55207E-05 |
| PH_mr_0002203 | hsa-miR-27b-3p  | 382.6735558 | 883.1090632 | 2.307734751 | 1.206477412 | 0.012505792 |
| PH_mr_0002951 | hsa-miR-103a-3p | 200.3112984 | 465.702045  | 2.32489155  | 1.21716342  | 8.33421E-05 |
| PH_mr_0008170 | hsa-miR-3676-5p | 679.9096761 | 1585.686716 | 2.332202015 | 1.22169276  | 4.81649E-06 |
| PH_mr_0001728 | hsa-miR-18a-5p  | 109.8481314 | 262.1730031 | 2.386686053 | 1.255008805 | 0.000243943 |
| PH_mr_0000169 | hsa-let-7c      | 1128.635703 | 2724.069493 | 2.413595003 | 1.271183615 | 9.71779E-05 |
| PH_mr_0004335 | hsa-miR-4284    | 9535.248583 | 23703.65915 | 2.485898395 | 1.313767331 | 2.18408E-05 |
| PH_mr_0004647 | hsa-miR-3609    | 178.0544875 | 443.8542948 | 2.492800384 | 1.317767361 | 0.000197019 |
| PH_mr_0001119 | hsa-miR-15a-5p  | 180.2083724 | 450.7535843 | 2.501291024 | 1.322672924 | 0.000267964 |
| PH_mr_0002528 | hsa-miR-23b-3p  | 416.417753  | 1044.092486 | 2.507319821 | 1.326146031 | 0.000385325 |
| PH_mr_0005109 | hsa-miR-3607-3p | 89.74520539 | 225.3767922 | 2.511296188 | 1.328432193 | 0.001036906 |
| PH_mr_0001890 | hsa-miR-30e-5p  | 134.9767889 | 339.2150698 | 2.513136315 | 1.329488926 | 8.33815E-06 |
| PH_mr_0001948 | hsa-miR-199a-5p | 252.0045367 | 641.6339287 | 2.546120546 | 1.348300725 | 9.15023E-05 |
| PH_mr_0001891 | hsa-miR-30a-5p  | 182.3622574 | 464.5521634 | 2.547413978 | 1.34903343  | 0.000119866 |
| PH_mr_0004646 | hsa-miR-3607-5p | 173.7467176 | 448.4538212 | 2.581077946 | 1.36797371  | 2.70429E-05 |
| PH_mr_0000446 | hsa-miR-22-3p   | 186.6700272 | 484.1001505 | 2.593346976 | 1.374815244 | 0.000509134 |
| PH_mr_0004578 | hsa-miR-4730    | 152.92583   | 400.1587943 | 2.61668545  | 1.387740509 | 0.004677509 |
| PH_mr_0000207 | hsa-let-7d-5p   | 702.8844486 | 1866.257825 | 2.655141721 | 1.408788869 | 0.007956329 |
| PH_mr_0000017 | hsa-miR-100-5p  | 203.9011067 | 541.5942302 | 2.656161308 | 1.409342764 | 3.45543E-07 |
| PH_mr_0000042 | hsa-miR-125b-5p | 705.7562952 | 1914.552852 | 2.712767658 | 1.439765489 | 0.001069528 |
| PH_mr_0002247 | hsa-miR-195-5p  | 382.6735558 | 1039.49296  | 2.716396114 | 1.441693873 | 9.15766E-05 |
| PH_mr_0001700 | hsa-miR-106a-5p | 248.4147285 | 678.4301397 | 2.731038307 | 1.44944955  | 7.94052E-06 |

|               |                  |             |             |             |             |             |
|---------------|------------------|-------------|-------------|-------------|-------------|-------------|
| PH_mr_0000163 | hsa-let-7b-5p    | 900.3239005 | 2460.746608 | 2.733179256 | 1.450580082 | 0.000605409 |
| PH_mr_0000525 | hsa-miR-26b-5p   | 216.1064546 | 594.4887834 | 2.750907115 | 1.459907427 | 0.000107313 |
| PH_mr_0000149 | hsa-miR-29b-3p   | 185.2341039 | 510.5474272 | 2.756228018 | 1.462695245 | 0.000108654 |
|               | hsa-miR-199a-3p, |             |             |             |             |             |
| PH_mr_0002734 | hsa-miR-199b-3p  | 270.6715395 | 752.0225616 | 2.77835846  | 1.474232746 | 0.000531162 |
| PH_mr_0001128 | hsa-miR-99a-5p   | 241.2351121 | 673.8306133 | 2.793252638 | 1.481946065 | 0.000804957 |
| PH_mr_0000206 | hsa-let-7f-5p    | 1223.40664  | 3424.347383 | 2.799026318 | 1.484925052 | 1.06598E-05 |
| PH_mr_0002380 | hsa-miR-23a-3p   | 412.8279448 | 1162.53029  | 2.816016466 | 1.49365577  | 0.00644988  |
| PH_mr_0002874 | hsa-miR-21-5p    | 152.2078683 | 430.0557157 | 2.825449961 | 1.498480639 | 0.000202768 |
| PH_mr_0004725 | hsa-miR-4443     | 4302.744127 | 12194.49429 | 2.834120257 | 1.502900976 | 3.01528E-05 |
| PH_mr_0004730 | hsa-miR-4448     | 1328.22904  | 3818.756769 | 2.875073993 | 1.523599086 | 3.61317E-06 |
| PH_mr_0000205 | hsa-let-7e-5p    | 397.0327887 | 1153.331237 | 2.90487655  | 1.538476854 | 4.23722E-05 |
| PH_mr_0002737 | hsa-miR-29a-3p   | 302.9798134 | 917.605511  | 3.028602799 | 1.598652381 | 1.43882E-06 |
| PH_mr_0001874 | hsa-miR-24-3p    | 306.5696216 | 931.4040901 | 3.038148676 | 1.603192472 | 9.04571E-06 |
| PH_mr_0000823 | hsa-miR-145-5p   | 952.7351005 | 2903.451022 | 3.047490347 | 1.607621651 | 2.39556E-06 |
| PH_mr_0002736 | hsa-miR-29c-3p   | 218.9783012 | 668.0812054 | 3.050901399 | 1.609235555 | 6.13565E-06 |
| PH_mr_0000485 | hsa-miR-449a     | 313.0312764 | 985.4485249 | 3.148083272 | 1.654473703 | 0.00044402  |
| PH_mr_0001107 | hsa-miR-34b-5p   | 501.1372269 | 1585.686716 | 3.164176659 | 1.661830149 | 1.50944E-05 |
| PH_mr_0003339 | hsa-miR-424-5p   | 389.8531722 | 1294.766673 | 3.321164904 | 1.731689358 | 0.000121467 |
| PH_mr_0004549 | hsa-miR-4638-5p  | 1214.7911   | 4048.733088 | 3.33286364  | 1.736762292 | 1.72261E-06 |
| PH_mr_0002170 | hsa-miR-34c-5p   | 437.2386407 | 1486.796899 | 3.400424302 | 1.765714776 | 8.65895E-05 |
| PH_mr_0000203 | hsa-let-7a-5p    | 1197.560021 | 4185.568997 | 3.495080768 | 1.805325795 | 1.24418E-05 |
| PH_mr_0001589 | hsa-miR-16-5p    | 873.7593197 | 3067.884089 | 3.51113175  | 1.811936132 | 3.13207E-06 |
| PH_mr_0002298 | hsa-miR-27a-3p   | 353.2371284 | 1280.968094 | 3.626368779 | 1.858525646 | 0.002984543 |
| PH_mr_0002054 | hsa-miR-143-3p   | 678.4737528 | 2460.746608 | 3.626885489 | 1.858731196 | 4.24883E-05 |
| PH_mr_0003406 | hsa-miR-1248     | 176.6185642 | 651.9828631 | 3.691474143 | 1.884197053 | 6.12653E-06 |
| PH_mr_0000750 | hsa-miR-26a-5p   | 420.0075612 | 1701.824757 | 4.051890762 | 2.01859528  | 0.000377033 |
| PH_mr_0002253 | hsa-miR-449b-5p  | 313.0312764 | 1328.11324  | 4.242749334 | 2.084999445 | 0.001911233 |
| PH_mr_0004336 | hsa-miR-4286     | 3273.187131 | 14311.4263  | 4.37232145  | 2.128399471 | 8.1742E-06  |
| PH_mr_0004733 | hsa-miR-4454     | 5977.030679 | 27707.54686 | 4.635670845 | 2.212778132 | 6.49485E-06 |
| PH_mr_0008021 | hsa-miR-5100     | 1748.954563 | 8998.973344 | 5.145344274 | 2.363267611 | 0.000563224 |
| PH_mr_0000129 | hsa-miR-363-5p   | 1634.798661 | 10540.96456 | 6.447867134 | 2.688822016 | 0.000241909 |
| PH_mr_0000212 | hsa-miR-451a     | 104.8223999 | 1631.68198  | 15.56615744 | 3.960340949 | 0.001102745 |

127  
128  
129  
130  
131  
132  
133  
134

135 **Supplementary Table 4.** Down-regulated miRNAs between human pachytene  
 136 spermatocytes and round spermatids

| ID            | Name             | Normalized Intensity |             | $\log_2$ (Ratio) |              | P-value<br>(Differentially<br>expressed) |
|---------------|------------------|----------------------|-------------|------------------|--------------|------------------------------------------|
|               |                  | S3                   | S1          | S1/S3            | S1/S3        | S1/S3                                    |
| PH_mr_0008641 | hsa-miR-6514-5p  | 1825.776459          | 486.3999137 | 0.266407156      | -1.90829526  | 1.25122E-07                              |
| PH_mr_0000903 | hsa-miR-1        | 777.5524595          | 211.5782131 | 0.272107959      | -1.877748938 | 0.006184642                              |
| PH_mr_0008048 | hsa-miR-5194     | 6587.298076          | 1889.255457 | 0.286802788      | -1.801869044 | 9.93142E-08                              |
| PH_mr_0008715 | hsa-miR-6128     | 2011.728524          | 703.7275347 | 0.349812376      | -1.515346764 | 0.002114741                              |
| PH_mr_0001363 | hsa-miR-206      | 1522.796645          | 554.2429277 | 0.363963849      | -1.458132936 | 6.30378E-06                              |
| PH_mr_0004084 | hsa-miR-3146     | 1400.743166          | 513.9970719 | 0.366945979      | -1.446360408 | 2.50603E-06                              |
| PH_mr_0004235 | hsa-miR-3127-5p  | 2781.383406          | 1266.019634 | 0.455176237      | -1.135502851 | 4.45491E-06                              |
| PH_mr_0004988 | hsa-miR-3673     | 274.2613477          | 127.6368568 | 0.46538405       | -1.103506328 | 1.51156E-05                              |
| PH_mr_0004287 | hsa-miR-3198     | 2021.779987          | 964.7506563 | 0.477178853      | -1.067397984 | 2.665E-07                                |
| PH_mr_0004255 | hsa-miR-3153     | 1473.975253          | 727.8750482 | 0.493817686      | -1.017949589 | 4.94348E-07                              |
| PH_mr_0004819 | hsa-miR-4700-5p  | 4933.832412          | 2473.395306 | 0.501313198      | -0.996215878 | 8.17555E-06                              |
| PH_mr_0001373 | hsa-miR-135a-3p  | 863.7078567          | 446.154058  | 0.516556674      | -0.953001451 | 2.62181E-05                              |
| PH_mr_0001178 | hsa-miR-1243     | 492.5216872          | 258.7233584 | 0.525303484      | -0.928776941 | 7.83622E-06                              |
| PH_mr_0005048 | hsa-miR-4531     | 651.1912103          | 343.8145962 | 0.527977944      | -0.921450433 | 6.97215E-06                              |
| PH_mr_0008716 | hsa-miR-6130     | 4401.822834          | 2337.709278 | 0.531077548      | -0.913005556 | 0.000284536                              |
| PH_mr_0005148 | hsa-miR-3145-5p  | 6427.910591          | 3487.590871 | 0.54256991       | -0.882119055 | 9.39715E-05                              |
| PH_mr_0000514 | hsa-miR-184      | 445.1362188          | 243.7748977 | 0.547641121      | -0.868697317 | 1.04126E-05                              |
| PH_mr_0004266 | hsa-miR-3164     | 549.9586187          | 309.3181484 | 0.562438951      | -0.830231586 | 2.25514E-06                              |
| PH_mr_0000705 | hsa-miR-30c-2-3p | 863.7078567          | 490.9994401 | 0.568478608      | -0.814822034 | 2.23874E-06                              |
| PH_mr_0004902 | hsa-miR-4423-3p  | 1109.9687            | 653.1327447 | 0.58842447       | -0.765070851 | 1.46989E-07                              |
| PH_mr_0008057 | hsa-miR-5187-5p  | 1019.505533          | 605.9875994 | 0.594393635      | -0.750509429 | 4.59108E-05                              |
| PH_mr_0004115 | hsa-miR-205-3p   | 275.697271           | 165.5829493 | 0.600596984      | -0.735530866 | 0.007227073                              |
| PH_mr_0004903 | hsa-miR-4445-3p  | 1259.304722          | 769.2707855 | 0.610869452      | -0.711063998 | 1.10065E-05                              |
| PH_mr_0002129 | hsa-miR-576-3p   | 672.7300596          | 422.0065445 | 0.627304427      | -0.672762351 | 0.000209194                              |
| PH_mr_0008717 | hsa-miR-6508-5p  | 3730.528698          | 2353.80762  | 0.630958186      | -0.664383695 | 6.61619E-05                              |
| PH_mr_0005266 | hsa-miR-4764-5p  | 1453.154366          | 933.7038533 | 0.642535903      | -0.638151024 | 9.94615E-05                              |
| PH_mr_0004134 | hsa-miR-4306     | 838.5791992          | 543.8939933 | 0.648589893      | -0.624621552 | 6.58737E-06                              |
| PH_mr_0004211 | hsa-miR-2276     | 875.195243           | 570.34127   | 0.651673183      | -0.617779466 | 0.000404368                              |
| PH_mr_0004155 | hsa-miR-449b-3p  | 7330.388377          | 4836.401979 | 0.659774316      | -0.599955477 | 2.39574E-05                              |

137  
 138  
 139  
 140  
 141  
 142

143 **Supplementary Table 5.** Up-regulated miRNAs between human spermatogonia and  
 144 round spermatids

| ID            | Name              | Normalized Intensity |             |             | log <sub>2</sub> (Ratio) |             | P-value<br>(Differentially<br>expressed) |
|---------------|-------------------|----------------------|-------------|-------------|--------------------------|-------------|------------------------------------------|
|               |                   | S2                   | S3          | S2/S3       | S3/S2                    | S3/S2       |                                          |
| PH_mr_0001098 | hsa-let-7i-3p     | 139.2975493          | 81.84762732 | 1.701913101 | -0.767157376             | 0.000371329 |                                          |
| PH_mr_0003348 | hsa-miR-101-3p    | 170.7909082          | 92.61705197 | 1.844054681 | -0.882881436             | 0.003820345 |                                          |
| PH_mr_0000738 | hsa-miR-101-5p    | 117.4944546          | 77.53985746 | 1.515278186 | -0.599582679             | 0.001261331 |                                          |
| PH_mr_0002951 | hsa-miR-103a-3p   | 327.04642            | 200.3112984 | 1.632690829 | -0.707251624             | 6.54506E-05 |                                          |
| PH_mr_0001700 | hsa-miR-106a-5p   | 390.0331379          | 248.4147285 | 1.570088618 | -0.650845989             | 0.000138214 |                                          |
| PH_mr_0000723 | hsa-miR-106b-3p   | 140.5088323          | 93.33501361 | 1.505424672 | -0.590170521             | 0.000338533 |                                          |
| PH_mr_0001024 | hsa-miR-10b-3p    | 132.029851           | 78.2578191  | 1.687113857 | -0.754557339             | 8.06834E-05 |                                          |
| PH_mr_0008672 | hsa-miR-1178-5p   | 138.0862662          | 88.30928211 | 1.563666502 | -0.644932848             | 8.34349E-05 |                                          |
| PH_mr_0008136 | hsa-miR-1185-1-3p | 1217.339452          | 669.8582131 | 1.817309139 | -0.861803854             | 1.38243E-07 |                                          |
| PH_mr_0008111 | hsa-miR-1185-2-3p | 976.2941278          | 560.7280433 | 1.741118782 | -0.800014629             | 7.70699E-06 |                                          |
| PH_mr_0004038 | hsa-miR-1193      | 438.4844594          | 269.2356162 | 1.628627243 | -0.703656441             | 1.0546E-05  |                                          |
| PH_mr_0001371 | hsa-miR-1224-5p   | 4343.660971          | 2789.998945 | 1.55686832  | -0.638646926             | 3.28412E-05 |                                          |
| PH_mr_0001438 | hsa-miR-1225-5p   | 1590.414628          | 961.3506402 | 1.654354365 | -0.726268295             | 4.55105E-06 |                                          |
| PH_mr_0008608 | hsa-miR-1234-5p   | 15941.69605          | 9999.769766 | 1.594206309 | -0.672838343             | 3.07645E-05 |                                          |
| PH_mr_0000922 | hsa-miR-124-5p    | 128.3960019          | 80.41170403 | 1.596732758 | -0.675122872             | 0.000435111 |                                          |
| PH_mr_0001528 | hsa-miR-1246      | 21737.68538          | 12449.45489 | 1.746075276 | -0.804115757             | 0.000549038 |                                          |
| PH_mr_0008003 | hsa-miR-1247-3p   | 396.0895531          | 212.5166464 | 1.863804835 | -0.898250799             | 4.51027E-06 |                                          |
| PH_mr_0003406 | hsa-miR-1248      | 311.2997405          | 176.6185642 | 1.762553908 | -0.817667383             | 0.001030004 |                                          |
| PH_mr_0001599 | hsa-miR-126-5p    | 124.7621528          | 82.56558896 | 1.511067194 | -0.595567815             | 0.004932479 |                                          |
| PH_mr_0000585 | hsa-miR-1263      | 136.8749832          | 82.56558896 | 1.657772746 | -0.72924625              | 0.000352836 |                                          |
| PH_mr_0001355 | hsa-miR-127-3p    | 151.4103796          | 98.36074511 | 1.539337461 | -0.622309541             | 0.000767352 |                                          |
| PH_mr_0008013 | hsa-miR-1271-3p   | 133.2411341          | 84.00151225 | 1.586175421 | -0.665552333             | 0.000105207 |                                          |
| PH_mr_0000912 | hsa-miR-1278      | 139.2975493          | 86.15539718 | 1.616817446 | -0.693156794             | 0.003342252 |                                          |
| PH_mr_0000663 | hsa-miR-1294      | 578.9932917          | 312.3133148 | 1.853886031 | -0.890552556             | 0.000297748 |                                          |
| PH_mr_0000688 | hsa-miR-1303      | 360.962345           | 233.337534  | 1.546953629 | -0.629429952             | 3.22165E-05 |                                          |
| PH_mr_0001554 | hsa-miR-1307-3p   | 178.0586064          | 102.668515  | 1.734305853 | -0.794358347             | 9.59576E-06 |                                          |
| PH_mr_0000844 | hsa-miR-132-5p    | 145.3539644          | 95.48889854 | 1.522207991 | -0.606165499             | 0.000256187 |                                          |
| PH_mr_0000637 | hsa-miR-1323      | 270.1161172          | 175.1826409 | 1.541911435 | -0.624719901             | 9.3567E-05  |                                          |
| PH_mr_0002897 | hsa-miR-135a-5p   | 141.7201153          | 82.56558896 | 1.716454968 | -0.779432008             | 0.000310093 |                                          |
| PH_mr_0001842 | hsa-miR-139-5p    | 146.5652475          | 91.89909032 | 1.594849818 | -0.673420576             | 7.53981E-05 |                                          |
| PH_mr_0001683 | hsa-miR-140-5p    | 136.8749832          | 73.2320876  | 1.869057508 | -0.902310959             | 1.83228E-05 |                                          |
| PH_mr_0002984 | hsa-miR-142-3p    | 147.7765305          | 68.2063561  | 2.166609374 | -1.115439068             | 9.15098E-06 |                                          |
| PH_mr_0000849 | hsa-miR-144-3p    | 201.0729841          | 94.05297525 | 2.137869468 | -1.096173769             | 3.23647E-06 |                                          |

|               |                  |             |             |             |              |             |
|---------------|------------------|-------------|-------------|-------------|--------------|-------------|
| PH_mr_0000647 | hsa-miR-145-3p   | 138.0862662 | 87.59132046 | 1.57648344  | -0.656710016 | 3.25258E-05 |
| PH_mr_0003467 | hsa-miR-1469     | 352.4833638 | 202.4651834 | 1.740957916 | -0.79988133  | 6.4513E-06  |
| PH_mr_0000176 | hsa-miR-146a-5p  | 136.8749832 | 89.74520539 | 1.525150927 | -0.608952017 | 0.00074207  |
| PH_mr_0000341 | hsa-miR-148a-3p  | 144.1426814 | 87.59132046 | 1.645627451 | -0.718637765 | 0.000162325 |
| PH_mr_0001511 | hsa-miR-151a-3p  | 168.3683421 | 110.566093  | 1.522784585 | -0.606711871 | 0.000162312 |
| PH_mr_0002107 | hsa-miR-153      | 132.029851  | 79.69374239 | 1.656715409 | -0.728325797 | 8.77176E-05 |
| PH_mr_0001119 | hsa-miR-15a-5p   | 337.9479673 | 180.2083724 | 1.875317793 | -0.907135097 | 0.00069457  |
| PH_mr_0003267 | hsa-miR-15b-5p   | 408.2023835 | 260.6200765 | 1.566273746 | -0.647336382 | 0.00243892  |
| PH_mr_0001589 | hsa-miR-16-5p    | 1317.875944 | 873.7593197 | 1.508282561 | -0.592906728 | 0.002547955 |
| PH_mr_0000747 | hsa-miR-186-5p   | 138.0862662 | 75.38597253 | 1.831723616 | -0.873201836 | 2.55348E-06 |
| PH_mr_0001728 | hsa-miR-18a-5p   | 196.227852  | 109.8481314 | 1.786355849 | -0.837019499 | 0.000126267 |
| PH_mr_0001673 | hsa-miR-18b-5p   | 145.3539644 | 82.56558896 | 1.760466633 | -0.815957884 | 0.000108976 |
| PH_mr_0003464 | hsa-miR-1908     | 13560.3136  | 7216.950437 | 1.878953405 | -0.909929291 | 3.04127E-05 |
| PH_mr_0000522 | hsa-miR-190a     | 128.3960019 | 84.71947389 | 1.515542956 | -0.599834744 | 0.001414108 |
| PH_mr_0002396 | hsa-miR-191-3p   | 135.6637001 | 77.53985746 | 1.749599555 | -0.807024759 | 0.000257463 |
| PH_mr_0003484 | hsa-miR-1911-5p  | 133.2411341 | 82.56558896 | 1.613761081 | -0.690427002 | 0.031947738 |
| PH_mr_0003492 | hsa-miR-1914-3p  | 1086.520884 | 710.7820267 | 1.528627404 | -0.612236799 | 5.97318E-05 |
| PH_mr_0004003 | hsa-miR-1915-3p  | 558.40148   | 348.9293586 | 1.600328165 | -0.678367776 | 8.41503E-05 |
| PH_mr_0002247 | hsa-miR-195-5p   | 742.5165017 | 382.6735558 | 1.940339201 | -0.95630888  | 0.000352095 |
| PH_mr_0001946 | hsa-miR-199b-5p  | 161.1006439 | 104.1044383 | 1.547490641 | -0.629930685 | 9.63201E-05 |
| PH_mr_0003126 | hsa-miR-19b-2-5p | 136.8749832 | 90.46316704 | 1.513046554 | -0.597456378 | 0.001135072 |
| PH_mr_0001726 | hsa-miR-203a     | 122.3395867 | 76.10393417 | 1.607533015 | -0.684848367 | 0.000616041 |
| PH_mr_0001203 | hsa-miR-205-5p   | 132.029851  | 86.15539718 | 1.532461753 | -0.615851068 | 3.89728E-06 |
| PH_mr_0001910 | hsa-miR-20a-3p   | 127.1847189 | 71.79616432 | 1.77146955  | -0.824946667 | 8.5564E-06  |
| PH_mr_0001696 | hsa-miR-20a-5p   | 387.6105718 | 255.594345  | 1.516506838 | -0.600752003 | 0.001806276 |
| PH_mr_0000422 | hsa-miR-21-3p    | 141.7201153 | 86.87335882 | 1.631341498 | -0.706058821 | 0.00026623  |
| PH_mr_0002874 | hsa-miR-21-5p    | 248.3130226 | 152.2078683 | 1.631407267 | -0.706116984 | 0.002921658 |
| PH_mr_0001414 | hsa-miR-218-1-3p | 121.1283037 | 79.69374239 | 1.519922394 | -0.603997662 | 3.24813E-05 |
| PH_mr_0000446 | hsa-miR-22-3p    | 316.1448726 | 186.6700272 | 1.693602756 | -0.760095523 | 0.006857838 |
| PH_mr_0004651 | hsa-miR-23c      | 132.029851  | 87.59132046 | 1.50733943  | -0.592004326 | 5.04976E-05 |
| PH_mr_0001658 | hsa-miR-26a-1-3p | 111.4380394 | 71.79616432 | 1.552144748 | -0.634263105 | 6.93427E-05 |
| PH_mr_0000750 | hsa-miR-26a-5p   | 664.9943873 | 420.0075612 | 1.583291466 | -0.662926864 | 0.007753401 |
| PH_mr_0002298 | hsa-miR-27a-3p   | 605.6415185 | 353.2371284 | 1.714546603 | -0.777827118 | 0.000153456 |
| PH_mr_0000433 | hsa-miR-296-5p   | 140.5088323 | 90.46316704 | 1.553215932 | -0.635258411 | 3.26071E-05 |
| PH_mr_0000255 | hsa-miR-299-3p   | 226.5099279 | 148.6180601 | 1.524107687 | -0.607964841 | 1.67219E-06 |
| PH_mr_0002338 | hsa-miR-30a-3p   | 176.8473234 | 117.0277478 | 1.511157197 | -0.595653744 | 0.001175481 |
| PH_mr_0001970 | hsa-miR-30b-3p   | 1895.657953 | 1176.739133 | 1.610941541 | -0.687904142 | 3.23134E-05 |
| PH_mr_0002420 | hsa-miR-30c-1-3p | 3567.228544 | 1881.777467 | 1.89566971  | -0.922707619 | 1.45377E-05 |
| PH_mr_0002352 | hsa-miR-30e-3p   | 167.1570591 | 109.1301698 | 1.531721791 | -0.615154282 | 0.041327237 |
| PH_mr_0001890 | hsa-miR-30e-5p   | 250.7355887 | 134.9767889 | 1.857620045 | -0.893455445 | 0.001109493 |

|               |                 |             |             |             |              |             |
|---------------|-----------------|-------------|-------------|-------------|--------------|-------------|
| PH_mr_0004600 | hsa-miR-3127-3p | 138.0862662 | 90.46316704 | 1.526436347 | -0.61016743  | 0.000383657 |
| PH_mr_0004128 | hsa-miR-3129-5p | 129.607285  | 82.56558896 | 1.569749415 | -0.650534274 | 0.00090891  |
| PH_mr_0004244 | hsa-miR-3139    | 130.818568  | 81.12966568 | 1.612462801 | -0.689265879 | 1.8566E-05  |
| PH_mr_0004082 | hsa-miR-3144-3p | 134.4524171 | 82.56558896 | 1.628431636 | -0.703483154 | 0.000805793 |
| PH_mr_0004970 | hsa-miR-3152-5p | 138.0862662 | 90.46316704 | 1.526436347 | -0.61016743  | 0.000108926 |
| PH_mr_0004260 | hsa-miR-3157-5p | 152.6216627 | 99.7966684  | 1.52932623  | -0.61289619  | 1.26924E-05 |
| PH_mr_0004277 | hsa-miR-3176    | 640.7687266 | 360.4167449 | 1.777855041 | -0.830137697 | 0.004626974 |
| PH_mr_0004040 | hsa-miR-3178    | 2799.275098 | 1536.437916 | 1.821925291 | -0.865463802 | 2.88599E-06 |
| PH_mr_0004051 | hsa-miR-3195    | 460.287554  | 264.2098847 | 1.742128439 | -0.800850991 | 1.99243E-05 |
| PH_mr_0004289 | hsa-miR-3200-3p | 133.2411341 | 87.59132046 | 1.521168232 | -0.605179715 | 0.000151552 |
| PH_mr_0002259 | hsa-miR-320a    | 1396.609342 | 879.5030129 | 1.587952879 | -0.667168103 | 5.82898E-05 |
| PH_mr_0000512 | hsa-miR-320c    | 1876.277424 | 940.5297525 | 1.994915545 | -0.996327671 | 4.03795E-07 |
| PH_mr_0000477 | hsa-miR-324-5p  | 132.029851  | 84.00151225 | 1.571755645 | -0.652376944 | 0.001975656 |
| PH_mr_0000096 | hsa-miR-329     | 125.9734358 | 80.41170403 | 1.566605724 | -0.647642135 | 0.000256198 |
| PH_mr_0003370 | hsa-miR-331-3p  | 156.2555118 | 104.1044383 | 1.500949569 | -0.585875504 | 0.000198365 |
| PH_mr_0000216 | hsa-miR-337-5p  | 136.8749832 | 90.46316704 | 1.513046554 | -0.597456378 | 1.60658E-05 |
| PH_mr_0002340 | hsa-miR-33b-3p  | 132.029851  | 82.56558896 | 1.599090525 | -0.677251613 | 1.16051E-06 |
| PH_mr_0001107 | hsa-miR-34b-5p  | 1078.041903 | 501.1372269 | 2.151191021 | -1.105135639 | 0.000845231 |
| PH_mr_0002170 | hsa-miR-34c-5p  | 1124.070658 | 437.2386407 | 2.570840163 | -1.362239916 | 1.25633E-05 |
| PH_mr_0005109 | hsa-miR-3607-3p | 157.4667948 | 89.74520539 | 1.754598411 | -0.811140867 | 3.36114E-07 |
| PH_mr_0004976 | hsa-miR-3618    | 135.6637001 | 76.82189582 | 1.765950953 | -0.820445275 | 0.000418725 |
| PH_mr_0004507 | hsa-miR-3621    | 6098.810091 | 4059.35513  | 1.502408608 | -0.587277234 | 5.75674E-05 |
| PH_mr_0000129 | hsa-miR-363-5p  | 4164.391081 | 1634.798661 | 2.547341871 | -1.348992592 | 3.70659E-07 |
| PH_mr_0004978 | hsa-miR-3649    | 161.1006439 | 106.9762848 | 1.505947268 | -0.590671254 | 0.001014625 |
| PH_mr_0004982 | hsa-miR-3658    | 117.4944546 | 73.2320876  | 1.604412197 | -0.682044839 | 7.96229E-05 |
| PH_mr_0002907 | hsa-miR-367-3p  | 116.2831715 | 66.05247117 | 1.760466633 | -0.815957884 | 0.000196328 |
| PH_mr_0004986 | hsa-miR-3671    | 145.3539644 | 89.74520539 | 1.619629303 | -0.69566365  | 0.004499549 |
| PH_mr_0004987 | hsa-miR-3672    | 112.6493224 | 74.66801089 | 1.508669122 | -0.593276432 | 2.15425E-06 |
| PH_mr_0004669 | hsa-miR-3679-5p | 13699.61115 | 9075.753131 | 1.509473754 | -0.594045672 | 0.000329359 |
| PH_mr_0004514 | hsa-miR-3687    | 406.9911004 | 224.7219943 | 1.81108708  | -0.856855915 | 3.01606E-05 |
| PH_mr_0004993 | hsa-miR-3688-5p | 117.4944546 | 73.2320876  | 1.604412197 | -0.682044839 | 0.000311642 |
| PH_mr_0002283 | hsa-miR-369-5p  | 128.3960019 | 81.12966568 | 1.582602379 | -0.662298831 | 6.03427E-05 |
| PH_mr_0002318 | hsa-miR-372     | 147.7765305 | 94.05297525 | 1.571205271 | -0.651871675 | 0.00019178  |
| PH_mr_0001189 | hsa-miR-374a-5p | 140.5088323 | 91.89909032 | 1.528946933 | -0.612538334 | 6.90587E-05 |
| PH_mr_0008164 | hsa-miR-374c-3p | 129.607285  | 76.82189582 | 1.687113857 | -0.754557339 | 8.19316E-05 |
| PH_mr_0000555 | hsa-miR-376c-3p | 159.8893609 | 99.7966684  | 1.602151289 | -0.680010386 | 5.04569E-05 |
| PH_mr_0000329 | hsa-miR-377-3p  | 148.9878135 | 95.48889854 | 1.560263191 | -0.641789409 | 9.82881E-05 |
| PH_mr_0001978 | hsa-miR-377-5p  | 136.8749832 | 85.43743554 | 1.602049293 | -0.679918538 | 0.000609933 |
| PH_mr_0000415 | hsa-miR-381-3p  | 153.8329457 | 96.92482183 | 1.58713674  | -0.666426429 | 8.49805E-05 |
| PH_mr_0002851 | hsa-miR-384     | 135.6637001 | 80.41170403 | 1.687113857 | -0.754557339 | 3.59025E-05 |



|               |                 |             |             |             |              |             |
|---------------|-----------------|-------------|-------------|-------------|--------------|-------------|
| PH_mr_0005005 | hsa-miR-3942-5p | 130.818568  | 73.2320876  | 1.786355849 | -0.837019499 | 3.04589E-05 |
| PH_mr_0005053 | hsa-miR-3973    | 125.9734358 | 79.69374239 | 1.580719289 | -0.660581191 | 0.000134276 |
| PH_mr_0005054 | hsa-miR-3974    | 127.1847189 | 84.00151225 | 1.514076538 | -0.598438137 | 0.003198352 |
| PH_mr_0000982 | hsa-miR-409-5p  | 130.818568  | 81.84762732 | 1.598318391 | -0.676554827 | 0.00012532  |
| PH_mr_0000435 | hsa-miR-410     | 122.3395867 | 73.95004924 | 1.654354365 | -0.726268295 | 0.00075521  |
| PH_mr_0003339 | hsa-miR-424-5p  | 666.2056703 | 389.8531722 | 1.708863023 | -0.77303676  | 0.000665702 |
| PH_mr_0004317 | hsa-miR-4260    | 148.9878135 | 95.48889854 | 1.560263191 | -0.641789409 | 3.47282E-05 |
| PH_mr_0004109 | hsa-miR-4263    | 141.7201153 | 87.59132046 | 1.617969846 | -0.694184721 | 0.002103576 |
| PH_mr_0004107 | hsa-miR-4266    | 140.5088323 | 83.28355061 | 1.687113857 | -0.754557339 | 3.10905E-05 |
| PH_mr_0004327 | hsa-miR-4270    | 11491.44217 | 7640.547806 | 1.504007627 | -0.588811883 | 8.89489E-06 |
| PH_mr_0004143 | hsa-miR-4272    | 119.9170207 | 72.51412596 | 1.653705662 | -0.725702476 | 9.28661E-06 |
| PH_mr_0004113 | hsa-miR-4282    | 139.2975493 | 86.87335882 | 1.603455319 | -0.681184153 | 0.000146451 |
| PH_mr_0004336 | hsa-miR-4286    | 8126.497895 | 3273.187131 | 2.482747722 | -1.311937674 | 0.000299189 |
| PH_mr_0004145 | hsa-miR-4291    | 152.6216627 | 96.20686018 | 1.586390642 | -0.665748072 | 2.61362E-05 |
| PH_mr_0004133 | hsa-miR-4303    | 136.8749832 | 83.28355061 | 1.643481602 | -0.716755306 | 0.000454007 |
| PH_mr_0000048 | hsa-miR-431-5p  | 129.607285  | 81.12966568 | 1.59753259  | -0.675845363 | 3.75633E-05 |
| PH_mr_0004137 | hsa-miR-4320    | 135.6637001 | 89.74520539 | 1.511654016 | -0.596127976 | 0.000145782 |
| PH_mr_0004057 | hsa-miR-4321    | 185.3263047 | 113.4379396 | 1.633724178 | -0.708164434 | 7.08935E-06 |
| PH_mr_0004340 | hsa-miR-4330    | 178.0586064 | 117.0277478 | 1.521507589 | -0.60550153  | 5.68066E-05 |
| PH_mr_0004704 | hsa-miR-4417    | 324.6238539 | 190.2598354 | 1.706213259 | -0.77079798  | 6.25896E-06 |
| PH_mr_0004705 | hsa-miR-4418    | 146.5652475 | 94.7709369  | 1.546521036 | -0.629026457 | 0.000192167 |
| PH_mr_0004718 | hsa-miR-4432    | 150.1990966 | 96.20686018 | 1.561209838 | -0.642664459 | 0.000237714 |
| PH_mr_0004725 | hsa-miR-4443    | 9926.464488 | 4302.744127 | 2.307007852 | -1.206022914 | 0.000164129 |
| PH_mr_0004730 | hsa-miR-4448    | 2978.544988 | 1328.22904  | 2.2424935   | -1.165103803 | 2.42518E-06 |
| PH_mr_0004524 | hsa-miR-4449    | 237.4114752 | 151.4899067 | 1.567176853 | -0.648167994 | 0.000465406 |
| PH_mr_0004733 | hsa-miR-4454    | 13113.35016 | 5977.030679 | 2.193957311 | -1.133535455 | 0.000122275 |
| PH_mr_0005024 | hsa-miR-4460    | 124.7621528 | 80.41170403 | 1.551542208 | -0.633702944 | 0.000791273 |
| PH_mr_0004528 | hsa-miR-4466    | 787.333974  | 523.3940379 | 1.504285332 | -0.589078243 | 6.25848E-05 |
| PH_mr_0004740 | hsa-miR-4472    | 2336.564978 | 1555.822881 | 1.501819396 | -0.586711329 | 2.73176E-05 |
| PH_mr_0005031 | hsa-miR-4474-5p | 129.607285  | 80.41170403 | 1.611796274 | -0.688669403 | 6.51255E-05 |
| PH_mr_0004748 | hsa-miR-4484    | 6448.870889 | 3487.857662 | 1.848948986 | -0.88670542  | 0.002887965 |
| PH_mr_0004756 | hsa-miR-4493    | 164.734493  | 106.2583232 | 1.550320842 | -0.632566815 | 4.67868E-05 |
| PH_mr_0004759 | hsa-miR-4497    | 51691.5036  | 33039.87686 | 1.564518652 | -0.645718858 | 0.000509159 |
| PH_mr_0000485 | hsa-miR-449a    | 654.09284   | 313.0312764 | 2.089544685 | -1.063188611 | 0.000770707 |
| PH_mr_0002253 | hsa-miR-449b-5p | 932.6879385 | 313.0312764 | 2.97953594  | -1.57508765  | 0.003766231 |
| PH_mr_0005043 | hsa-miR-4501    | 156.2555118 | 102.668515  | 1.521941871 | -0.605913258 | 0.000486723 |
| PH_mr_0005225 | hsa-miR-4509    | 125.9734358 | 70.36024103 | 1.790406542 | -0.840287213 | 6.43037E-05 |
| PH_mr_0004769 | hsa-miR-4517    | 145.3539644 | 96.20686018 | 1.51084823  | -0.595358744 | 0.003375176 |
| PH_mr_0000212 | hsa-miR-451a    | 1212.49432  | 104.8223999 | 11.56712994 | -3.531959039 | 0.006059413 |
| PH_mr_0001571 | hsa-miR-455-5p  | 133.2411341 | 85.43743554 | 1.559517011 | -0.641099289 | 0.001733801 |

|               |                  |             |             |             |              |             |
|---------------|------------------|-------------|-------------|-------------|--------------|-------------|
| PH_mr_0004548 | hsa-miR-4634     | 994.4633734 | 463.8032215 | 2.144149345 | -1.100405396 | 5.82276E-07 |
| PH_mr_0004549 | hsa-miR-4638-5p  | 2815.021778 | 1214.7911   | 2.317288773 | -1.212437839 | 3.31277E-06 |
| PH_mr_0005060 | hsa-miR-4650-5p  | 136.8749832 | 89.02724375 | 1.537450531 | -0.620539991 | 0.000148572 |
| PH_mr_0004915 | hsa-miR-4659a-3p | 135.6637001 | 81.84762732 | 1.657515368 | -0.729022247 | 0.000204573 |
| PH_mr_0005065 | hsa-miR-4662b    | 138.0862662 | 90.46316704 | 1.526436347 | -0.61016743  | 0.000814901 |
| PH_mr_0004556 | hsa-miR-4663     | 162.311927  | 106.9762848 | 1.51727018  | -0.601478009 | 0.000768791 |
| PH_mr_0004558 | hsa-miR-4665-5p  | 1104.69013  | 722.9873747 | 1.527952172 | -0.611599385 | 1.6407E-05  |
| PH_mr_0005066 | hsa-miR-4666a-5p | 140.5088323 | 86.87335882 | 1.617398408 | -0.693675097 | 0.000243533 |
| PH_mr_0004811 | hsa-miR-4677-5p  | 127.1847189 | 77.53985746 | 1.640249583 | -0.713915355 | 0.000178181 |
| PH_mr_0005069 | hsa-miR-4679     | 130.818568  | 86.87335882 | 1.505853691 | -0.590581604 | 3.5748E-05  |
| PH_mr_0005126 | hsa-miR-4704-3p  | 127.1847189 | 78.97578075 | 1.610426864 | -0.687443143 | 5.49606E-07 |
| PH_mr_0004931 | hsa-miR-4714-3p  | 136.8749832 | 86.15539718 | 1.588698882 | -0.667845706 | 0.000154786 |
| PH_mr_0004619 | hsa-miR-4717-3p  | 210.7632484 | 137.8486355 | 1.528946933 | -0.612538334 | 1.9102E-05  |
| PH_mr_0004834 | hsa-miR-4723-5p  | 4553.212936 | 2991.746167 | 1.521924883 | -0.605897154 | 0.000106894 |
| PH_mr_0004578 | hsa-miR-4730     | 266.4822681 | 152.92583   | 1.742558913 | -0.801207432 | 5.60448E-06 |
| PH_mr_0004837 | hsa-miR-4732-5p  | 4319.43531  | 2602.610956 | 1.659654625 | -0.730883047 | 4.20392E-05 |
| PH_mr_0005130 | hsa-miR-4735-3p  | 111.4380394 | 73.2320876  | 1.521710538 | -0.605693953 | 0.00190683  |
| PH_mr_0004627 | hsa-miR-4747-3p  | 146.5652475 | 89.74520539 | 1.633126214 | -0.707636292 | 0.002641695 |
| PH_mr_0004586 | hsa-miR-4749-5p  | 11973.53282 | 7894.706228 | 1.516653372 | -0.600891398 | 4.1758E-05  |
| PH_mr_0005086 | hsa-miR-4762-5p  | 140.5088323 | 91.89909032 | 1.528946933 | -0.612538334 | 0.001414244 |
| PH_mr_0004860 | hsa-miR-4781-5p  | 116.2831715 | 68.92431774 | 1.687113857 | -0.754557339 | 6.60652E-05 |
| PH_mr_0004598 | hsa-miR-4787-5p  | 27612.40811 | 18324.53502 | 1.506854503 | -0.591540122 | 0.000654378 |
| PH_mr_0004865 | hsa-miR-4792     | 4172.870062 | 2479.121554 | 1.683205108 | -0.751210988 | 9.7288E-07  |
| PH_mr_0004867 | hsa-miR-4797-5p  | 129.607285  | 82.56558896 | 1.569749415 | -0.650534274 | 8.61308E-06 |
| PH_mr_0005104 | hsa-miR-4802-5p  | 138.0862662 | 81.12966568 | 1.702044068 | -0.767268391 | 0.000120783 |
| PH_mr_0000218 | hsa-miR-487a     | 130.818568  | 84.71947389 | 1.544138106 | -0.626801792 | 2.50269E-05 |
| PH_mr_0002000 | hsa-miR-488-3p   | 142.9313984 | 89.02724375 | 1.605479316 | -0.683004078 | 3.51753E-05 |
| PH_mr_0000497 | hsa-miR-490-5p   | 148.9878135 | 99.07870675 | 1.503731916 | -0.588547388 | 0.004700166 |
| PH_mr_0002575 | hsa-miR-491-3p   | 270.1161172 | 178.7724491 | 1.510949358 | -0.595455307 | 0.01046796  |
| PH_mr_0000226 | hsa-miR-495-3p   | 136.8749832 | 85.43743554 | 1.602049293 | -0.679918538 | 1.97423E-05 |
| PH_mr_0000062 | hsa-miR-498      | 288.2853628 | 178.0544875 | 1.619085072 | -0.695178792 | 0.000817988 |
| PH_mr_0000729 | hsa-miR-499a-3p  | 130.818568  | 76.10393417 | 1.718946194 | -0.781524387 | 0.000187421 |
| PH_mr_0000079 | hsa-miR-499a-5p  | 136.8749832 | 87.59132046 | 1.562654638 | -0.643998964 | 0.00023024  |
| PH_mr_0008052 | hsa-miR-5003-5p  | 146.5652475 | 91.18112868 | 1.607407691 | -0.68473589  | 6.65633E-06 |
| PH_mr_0008146 | hsa-miR-5011-3p  | 136.8749832 | 82.56558896 | 1.657772746 | -0.72924625  | 0.003519347 |
| PH_mr_0000781 | hsa-miR-505-3p   | 107.8041903 | 67.48839446 | 1.597373758 | -0.675701918 | 3.1278E-06  |
| PH_mr_0003343 | hsa-miR-507      | 128.3960019 | 76.10393417 | 1.687113857 | -0.754557339 | 0.000238157 |
| PH_mr_0004876 | hsa-miR-5096     | 5594.916348 | 3388.060994 | 1.651362345 | -0.723656714 | 0.00014941  |
| PH_mr_0008021 | hsa-miR-5100     | 4349.717386 | 1748.954563 | 2.487038531 | -1.314428859 | 4.45665E-07 |
| PH_mr_0000977 | hsa-miR-513a-5p  | 5484.689591 | 3314.828906 | 1.654592061 | -0.726475565 | 0.000160523 |

|               |                  |             |             |             |              |             |
|---------------|------------------|-------------|-------------|-------------|--------------|-------------|
| PH_mr_0000892 | hsa-miR-513c-5p  | 261.637136  | 161.5413697 | 1.619629303 | -0.69566365  | 0.000165903 |
| PH_mr_0004290 | hsa-miR-514b-5p  | 1090.154733 | 702.8844486 | 1.550972902 | -0.633173481 | 4.35498E-05 |
|               | hsa-miR-517a-3p, |             |             |             |              |             |
| PH_mr_0000404 | hsa-miR-517b-3p  | 150.1990966 | 96.92482183 | 1.549645321 | -0.631938052 | 0.000368469 |
| PH_mr_0000398 | hsa-miR-517c-3p  | 151.4103796 | 93.33501361 | 1.622224863 | -0.697973811 | 0.000149688 |
| PH_mr_0001219 | hsa-miR-518a-3p  | 152.6216627 | 99.7966684  | 1.52932623  | -0.61289619  | 0.00010807  |
| PH_mr_0002321 | hsa-miR-518d-3p  | 115.0718885 | 76.10393417 | 1.512036004 | -0.596492493 | 4.49318E-05 |
| PH_mr_0001183 | hsa-miR-518e-3p  | 138.0862662 | 77.53985746 | 1.780842405 | -0.832559851 | 0.000183084 |
| PH_mr_0001192 | hsa-miR-519a-5p  | 144.1426814 | 89.74520539 | 1.606132392 | -0.683590818 | 0.000376584 |
| PH_mr_0008041 | hsa-miR-5195-3p  | 914.5186929 | 528.4197694 | 1.730667068 | -0.791328217 | 2.29753E-05 |
| PH_mr_0000191 | hsa-miR-519b-3p  | 128.3960019 | 79.69374239 | 1.611117737 | -0.688061927 | 0.001338025 |
| PH_mr_0000146 | hsa-miR-519e-3p  | 140.5088323 | 91.89909032 | 1.528946933 | -0.612538334 | 1.25307E-05 |
| PH_mr_0000645 | hsa-miR-520a-5p  | 132.029851  | 79.69374239 | 1.656715409 | -0.728325797 | 0.005759903 |
| PH_mr_0000177 | hsa-miR-520f     | 136.8749832 | 84.71947389 | 1.615625982 | -0.692093252 | 0.013787667 |
| PH_mr_0000403 | hsa-miR-521      | 134.4524171 | 84.71947389 | 1.587030832 | -0.666330156 | 0.001134605 |
| PH_mr_0002274 | hsa-miR-526b-3p  | 132.029851  | 79.69374239 | 1.656715409 | -0.728325797 | 0.000471865 |
| PH_mr_0000378 | hsa-miR-539-5p   | 127.1847189 | 79.69374239 | 1.595918513 | -0.67438699  | 9.80048E-05 |
| PH_mr_0002524 | hsa-miR-548a-5p  | 139.2975493 | 86.15539718 | 1.616817446 | -0.693156794 | 8.13255E-05 |
| PH_mr_0002139 | hsa-miR-548ah-3p | 132.029851  | 81.12966568 | 1.627393013 | -0.702562701 | 2.01372E-06 |
| PH_mr_0008101 | hsa-miR-548at-5p | 124.7621528 | 80.41170403 | 1.551542208 | -0.633702944 | 0.000592289 |
|               | hsa-miR-548av-5p |             |             |             |              |             |
| PH_mr_0000719 | hsa-miR-548k     | 133.2411341 | 88.30928211 | 1.50880101  | -0.593402547 | 0.000208574 |
| PH_mr_0008706 | hsa-miR-548az-3p | 144.1426814 | 95.48889854 | 1.509522925 | -0.594092667 | 6.87118E-06 |
| PH_mr_0002447 | hsa-miR-548b-5p  | 152.6216627 | 91.18112868 | 1.673829496 | -0.743152576 | 0.00367454  |
| PH_mr_0002136 | hsa-miR-548d-3p  | 123.5508698 | 81.12966568 | 1.522881535 | -0.606803719 | 0.007729325 |
| PH_mr_0001981 | hsa-miR-548h-5p  | 167.1570591 | 104.8223999 | 1.594669262 | -0.673257237 | 0.005851088 |
| PH_mr_0001982 | hsa-miR-548l     | 151.4103796 | 94.05297525 | 1.609841467 | -0.686918622 | 0.019658939 |
| PH_mr_0000100 | hsa-miR-556-3p   | 151.4103796 | 100.51463   | 1.506351658 | -0.591058607 | 5.89452E-05 |
| PH_mr_0008103 | hsa-miR-5588-5p  | 132.029851  | 75.38597253 | 1.751384861 | -0.808496146 | 0.001022241 |
| PH_mr_0000630 | hsa-miR-561-3p   | 141.7201153 | 90.46316704 | 1.566605724 | -0.647642135 | 0.001255186 |
| PH_mr_0002475 | hsa-miR-563      | 127.1847189 | 71.79616432 | 1.77146955  | -0.824946667 | 0.000984693 |
| PH_mr_0002709 | hsa-miR-567      | 124.7621528 | 81.84762732 | 1.524322169 | -0.608167852 | 0.000758543 |
| PH_mr_0008154 | hsa-miR-5690     | 144.1426814 | 92.61705197 | 1.556329837 | -0.638147847 | 0.000466911 |
| PH_mr_0008128 | hsa-miR-5692a    | 130.818568  | 86.87335882 | 1.505853691 | -0.590581604 | 0.000239702 |
| PH_mr_0002393 | hsa-miR-586      | 135.6637001 | 86.87335882 | 1.561626049 | -0.643049024 | 0.000108316 |
| PH_mr_0001817 | hsa-miR-590-5p   | 133.2411341 | 83.28355061 | 1.599849347 | -0.677936057 | 3.3097E-05  |
| PH_mr_0000370 | hsa-miR-591      | 116.2831715 | 73.2320876  | 1.587871865 | -0.667094498 | 2.49747E-05 |
| PH_mr_0002694 | hsa-miR-607      | 136.8749832 | 89.74520539 | 1.525150927 | -0.608952017 | 0.001287041 |
| PH_mr_0008677 | hsa-miR-6073     | 153.8329457 | 94.7709369  | 1.623208029 | -0.698847906 | 0.000241512 |
| PH_mr_0008625 | hsa-miR-6084     | 132.029851  | 86.87335882 | 1.51979678  | -0.603878427 | 0.000645535 |

|               |                 |             |             |             |              |             |
|---------------|-----------------|-------------|-------------|-------------|--------------|-------------|
| PH_mr_0008628 | hsa-miR-6087    | 49937.56577 | 32568.89402 | 1.533290192 | -0.616630769 | 1.48364E-06 |
| PH_mr_0008629 | hsa-miR-6088    | 27924.91913 | 17478.7762  | 1.597647273 | -0.675948927 | 1.42485E-05 |
| PH_mr_0008683 | hsa-miR-6126    | 21918.16655 | 13263.6234  | 1.652502178 | -0.724652174 | 1.17714E-05 |
| PH_mr_0000583 | hsa-miR-618     | 136.8749832 | 84.00151225 | 1.629434751 | -0.704371582 | 0.008539536 |
| PH_mr_0000620 | hsa-miR-619     | 132.029851  | 82.56558896 | 1.599090525 | -0.677251613 | 2.87763E-05 |
| PH_mr_0001351 | hsa-miR-623     | 162.311927  | 99.7966684  | 1.626426308 | -0.701705457 | 3.16549E-05 |
| PH_mr_0003127 | hsa-miR-624-5p  | 141.7201153 | 91.89909032 | 1.54212751  | -0.624922059 | 0.000362732 |
| PH_mr_0002404 | hsa-miR-625-5p  | 264.0597021 | 160.1054464 | 1.649286192 | -0.721841764 | 0.001350428 |
| PH_mr_0001785 | hsa-miR-639     | 123.5508698 | 81.84762732 | 1.509522925 | -0.594092667 | 0.000125809 |
| PH_mr_0002273 | hsa-miR-646     | 123.5508698 | 79.69374239 | 1.550320842 | -0.632566815 | 0.000376841 |
| PH_mr_0008692 | hsa-miR-6505-5p | 175.6360404 | 114.1559013 | 1.538562951 | -0.621583474 | 3.56521E-05 |
| PH_mr_0001046 | hsa-miR-651     | 121.1283037 | 76.82189582 | 1.576741922 | -0.656946542 | 5.6894E-05  |
| PH_mr_0001125 | hsa-miR-652-3p  | 138.0862662 | 81.84762732 | 1.687113857 | -0.754557339 | 0.002654738 |
| PH_mr_0001084 | hsa-miR-660-5p  | 195.016569  | 116.3097862 | 1.676699574 | -0.745624214 | 1.34928E-06 |
| PH_mr_0001619 | hsa-miR-663a    | 975.0828448 | 613.8572049 | 1.588452228 | -0.667621702 | 9.64312E-06 |
| PH_mr_0000829 | hsa-miR-665     | 552.3450649 | 366.8783997 | 1.50552626  | -0.590267872 | 3.88114E-05 |
| PH_mr_0008651 | hsa-miR-6724-5p | 368.2300432 | 229.0297642 | 1.607782484 | -0.685072239 | 7.95614E-05 |
| PH_mr_0001714 | hsa-miR-708-3p  | 139.2975493 | 79.69374239 | 1.747910753 | -0.805631524 | 0.021992122 |
| PH_mr_0002589 | hsa-miR-759     | 147.7765305 | 96.92482183 | 1.524651041 | -0.60847908  | 0.00024155  |
| PH_mr_0008037 | hsa-miR-873-3p  | 127.1847189 | 81.84762732 | 1.553920658 | -0.635912843 | 2.13259E-05 |
| PH_mr_0002610 | hsa-miR-874     | 198.6504181 | 130.6690191 | 1.520256443 | -0.604314703 | 0.000210045 |
| PH_mr_0003139 | hsa-miR-876-3p  | 134.4524171 | 85.43743554 | 1.573694438 | -0.654155442 | 1.19626E-05 |
| PH_mr_0003261 | hsa-miR-876-5p  | 112.6493224 | 74.66801089 | 1.508669122 | -0.593276432 | 6.32234E-05 |
| PH_mr_0002427 | hsa-miR-887     | 157.4667948 | 100.51463   | 1.566605724 | -0.647642135 | 0.015844783 |
| PH_mr_0003341 | hsa-miR-888-3p  | 130.818568  | 81.84762732 | 1.598318391 | -0.676554827 | 8.70984E-05 |
| PH_mr_0000371 | hsa-miR-889     | 127.1847189 | 84.71947389 | 1.501245381 | -0.586159807 | 0.002590784 |
| PH_mr_0002885 | hsa-miR-891b    | 140.5088323 | 88.30928211 | 1.591099247 | -0.670023829 | 0.000144766 |
| PH_mr_0000045 | hsa-miR-9-5p    | 132.029851  | 81.84762732 | 1.613117635 | -0.68985165  | 0.000472349 |
| PH_mr_0002041 | hsa-miR-933     | 1608.583873 | 875.9132046 | 1.83646492  | -0.876931338 | 2.30481E-06 |
| PH_mr_0000621 | hsa-miR-938     | 138.0862662 | 91.18112868 | 1.514417163 | -0.598762666 | 8.2328E-05  |
| PH_mr_0000757 | hsa-miR-940     | 159.8893609 | 102.668515  | 1.557335868 | -0.639080122 | 0.000448584 |
| PH_mr_0001760 | hsa-miR-944     | 133.2411341 | 86.15539718 | 1.546521036 | -0.629026457 | 7.33544E-06 |
| PH_mr_0000718 | hsa-miR-96-5p   | 146.5652475 | 88.30928211 | 1.659681111 | -0.730906071 | 2.33491E-05 |

145  
146  
147  
148  
149  
150  
151  
152

153  
154

**Supplementary Table 6.** Down-regulated miRNAs between human spermatogonia and round spermatids

| ID            | Name             | Normalized Intensity |             | log <sub>2</sub> (Ratio) |             | P-value<br>(Differentially<br>expressed) |
|---------------|------------------|----------------------|-------------|--------------------------|-------------|------------------------------------------|
|               |                  | S2                   | S3          | S2/S3                    | S3/S2       | S3/S2                                    |
| PH_mr_0004114 | hsa-miR-4288     | 1032.013147          | 1549.361226 | 0.666089438              | 0.58621219  | 0.000628096                              |
| PH_mr_0001186 | hsa-miR-150-5p   | 525.696838           | 791.9116924 | 0.663832651              | 0.591108504 | 3.46251E-05                              |
| PH_mr_0005162 | hsa-miR-3662     | 713.4457088          | 1090.583736 | 0.654187006              | 0.612224992 | 0.000828626                              |
| PH_mr_0004731 | hsa-miR-4450     | 633.5010283          | 969.2482183 | 0.653600405              | 0.613519217 | 0.003539425                              |
| PH_mr_0004905 | hsa-miR-4520a-3p | 621.388198           | 951.2991772 | 0.653199554              | 0.61440429  | 3.42338E-05                              |
| PH_mr_0004212 | hsa-miR-2278     | 1498.357117          | 2312.554453 | 0.647922956              | 0.626105821 | 7.24127E-05                              |
| PH_mr_0001807 | hsa-miR-1224-3p  | 5777.820086          | 9040.573011 | 0.63909888               | 0.645888936 | 6.01068E-05                              |
| PH_mr_0004859 | hsa-miR-4780     | 1790.276329          | 2827.332951 | 0.63320322               | 0.659259503 | 6.68187E-06                              |
| PH_mr_0008057 | hsa-miR-5187-5p  | 641.9800096          | 1019.505533 | 0.629697426              | 0.667269326 | 3.59868E-05                              |
| PH_mr_0008654 | hsa-miR-939-3p   | 2808.965363          | 4485.106385 | 0.626287343              | 0.675103371 | 0.002335158                              |
| PH_mr_0004592 | hsa-miR-4763-5p  | 28385.20669          | 45475.69048 | 0.624184183              | 0.679956296 | 0.001412201                              |
| PH_mr_0003263 | hsa-miR-1260a    | 26890.48342          | 43568.06639 | 0.617206262              | 0.696175395 | 2.30846E-05                              |
| PH_mr_0000117 | hsa-miR-32-3p    | 1177.367112          | 1923.419242 | 0.612121937              | 0.708109023 | 0.000735582                              |
| PH_mr_0004235 | hsa-miR-3127-5p  | 1699.430101          | 2781.383406 | 0.61100174               | 0.710751606 | 1.22572E-05                              |
| PH_mr_0004902 | hsa-miR-4423-3p  | 672.2620855          | 1109.9687   | 0.605658597              | 0.723423304 | 1.39296E-05                              |
| PH_mr_0004925 | hsa-miR-4695-3p  | 4333.970706          | 7268.643675 | 0.596255767              | 0.745996781 | 2.07251E-06                              |
| PH_mr_0005148 | hsa-miR-3145-5p  | 3831.288246          | 6427.910591 | 0.596039443              | 0.746520291 | 0.000166506                              |
| PH_mr_0004085 | hsa-miR-3149     | 2351.100375          | 3953.814769 | 0.594641002              | 0.749909151 | 0.000190558                              |
| PH_mr_0004887 | hsa-miR-3622a-3p | 15655.83325          | 26336.26899 | 0.594459043              | 0.750350681 | 6.37019E-06                              |
| PH_mr_0005266 | hsa-miR-4764-5p  | 852.743258           | 1453.154366 | 0.586822211              | 0.769004617 | 5.03105E-05                              |
| PH_mr_0005201 | hsa-miR-4456     | 4606.50939           | 8112.248606 | 0.567846181              | 0.816427912 | 6.155E-06                                |
| PH_mr_0004339 | hsa-miR-4290     | 3477.593599          | 6142.161857 | 0.566183972              | 0.820657185 | 0.000429448                              |
| PH_mr_0004792 | hsa-miR-4641     | 1551.65357           | 2744.767362 | 0.565313327              | 0.822877385 | 0.001007679                              |
| PH_mr_0001178 | hsa-miR-1243     | 277.3838155          | 492.5216872 | 0.563191069              | 0.828303639 | 1.91351E-05                              |
| PH_mr_0004827 | hsa-miR-4713-5p  | 11109.88802          | 19828.66466 | 0.560294312              | 0.835743249 | 6.24126E-08                              |
| PH_mr_0002504 | hsa-miR-1238-3p  | 5632.466122          | 10098.13051 | 0.557773156              | 0.842249592 | 0.001250509                              |
| PH_mr_0008024 | hsa-miR-3184-3p  | 10087.56513          | 18173.76307 | 0.555061992              | 0.849279188 | 6.05119E-06                              |
| PH_mr_0004638 | hsa-miR-3120-5p  | 954.4910331          | 1734.59533  | 0.550267268              | 0.861795581 | 0.000133639                              |
| PH_mr_0004988 | hsa-miR-3673     | 148.9878135          | 274.2613477 | 0.543232996              | 0.880356984 | 0.000116944                              |
| PH_mr_0008662 | hsa-miR-6511a-3p | 9508.57184           | 17641.7535  | 0.538981108              | 0.89169339  | 3.65835E-05                              |
| PH_mr_0001373 | hsa-miR-135a-3p  | 446.9634406          | 863.7078567 | 0.517493777              | 0.950386582 | 5.72874E-05                              |
| PH_mr_0004201 | hsa-miR-2116-3p  | 4828.174185          | 9398.117909 | 0.513738414              | 0.960894143 | 3.37425E-06                              |
| PH_mr_0008664 | hsa-miR-6514-3p  | 1517.737645          | 2968.053433 | 0.511357925              | 0.967594635 | 1.20678E-05                              |
| PH_mr_0004820 | hsa-miR-4701-5p  | 14938.75369          | 29491.71042 | 0.50654077               | 0.981249704 | 9.52088E-07                              |
| PH_mr_0004643 | hsa-miR-3173-5p  | 2185.154599          | 4332.180555 | 0.504400629              | 0.987358019 | 1.67363E-05                              |

|               |                   |             |             |             |             |             |
|---------------|-------------------|-------------|-------------|-------------|-------------|-------------|
| PH_mr_0008618 | hsa-miR-6072      | 3621.736281 | 7227.0019   | 0.501139522 | 0.996715774 | 6.39413E-06 |
| PH_mr_0004155 | hsa-miR-449b-3p   | 3639.905526 | 7330.388377 | 0.496550161 | 1.009988631 | 8.61602E-07 |
| PH_mr_0008656 | hsa-miR-3617-3p   | 1068.351639 | 2152.449006 | 0.496342369 | 1.010592483 | 4.17495E-05 |
| PH_mr_0001774 | hsa-miR-125b-1-3p | 330.6802691 | 677.7557911 | 0.487904749 | 1.035328569 | 7.50177E-07 |
| PH_mr_0008712 | hsa-miR-6509-3p   | 3404.916617 | 7030.28041  | 0.484321594 | 1.045962765 | 0.00116849  |
| PH_mr_0008716 | hsa-miR-6130      | 2059.181163 | 4401.822834 | 0.467801918 | 1.096030319 | 0.000164294 |
| PH_mr_0004287 | hsa-miR-3198      | 942.3782028 | 2021.779987 | 0.466113132 | 1.101247935 | 2.94692E-07 |
| PH_mr_0002598 | hsa-miR-634       | 9227.554176 | 20441.8039  | 0.451406061 | 1.147502306 | 6.64367E-05 |
| PH_mr_0008719 | hsa-miR-98-3p     | 524.485555  | 1179.61098  | 0.444625867 | 1.169336211 | 3.13021E-05 |
| PH_mr_0008717 | hsa-miR-6508-5p   | 1640.077232 | 3730.528698 | 0.439636675 | 1.185616353 | 1.23262E-05 |
| PH_mr_0003276 | hsa-miR-664a-3p   | 1603.738741 | 3678.117498 | 0.436021618 | 1.197528431 | 0.013761991 |
| PH_mr_0004084 | hsa-miR-3146      | 580.2045747 | 1400.743166 | 0.414211962 | 1.271558878 | 2.3925E-06  |
| PH_mr_0008715 | hsa-miR-6128      | 800.6580874 | 2011.728524 | 0.397995096 | 1.32917744  | 0.020307332 |
| PH_mr_0001363 | hsa-miR-206       | 530.5419702 | 1522.796645 | 0.34839975  | 1.521184507 | 2.79743E-06 |
| PH_mr_0000903 | hsa-miR-1         | 237.4114752 | 777.5524595 | 0.305331778 | 1.711550344 | 0.000320368 |
| PH_mr_0008048 | hsa-miR-5194      | 1982.870332 | 6587.298076 | 0.301014211 | 1.732096497 | 7.46748E-08 |
| PH_mr_0008641 | hsa-miR-6514-5p   | 485.7244978 | 1825.776459 | 0.266037222 | 1.910299981 | 1.88169E-07 |

155

156

157
